# Supplementary material for: Molecular and clinical characterization of PTPN2 expression from RNA-seq data of 996 brain gliomas
Source: J Neuroinflammation. 2018 May 15;15:145. doi: 10.1186/s12974-018-1187-4 (PMC5953404; doi:10.1186/s12974-018-1187-4)
Supplement: Supplementary file 3 — Table S1. Immune response-related gene-Amigo 2. (XLSX 71 kb) [file 12974_2018_1187_MOESM3_ESM.xlsx]

## Sheet: Sheet1
Gene	Gene name
EREG	Proepiregulin
CD96	T-cell surface protein tactile
TRIM26	Tripartite motif-containing protein 26
PLD2	Phospholipase D2
NCR3	Natural cytotoxicity triggering receptor 3
TP53BP1	TP53-binding protein 1
IKBKB	Inhibitor of nuclear factor kappa-B kinase subunit beta
SIGLEC16	Sialic acid-binding Ig-like lectin 16
BRAF	Serine/threonine-protein kinase B-raf
CDH17	Cadherin-17
MAP4K2	Mitogen-activated protein kinase kinase kinase kinase 2
STX4	Syntaxin-4
LIF	Leukemia inhibitory factor
ZP4	Zona pellucida sperm-binding protein 4
SERPINB9	Serpin B9
HMGB1	High mobility group protein B1
IGKV6D-21	Immunoglobulin kappa variable 6D-21
GAB2	GRB2-associated-binding protein 2
C1QC	Complement C1q subcomponent subunit C
TTR	Transthyretin
RELT	Tumor necrosis factor receptor superfamily member 19L
PF4	Platelet factor 4
LTF	Lactotransferrin
TMBIM1	Protein lifeguard 3
CEACAM6	Carcinoembryonic antigen-related cell adhesion molecule 6
CEACAM3	Carcinoembryonic antigen-related cell adhesion molecule 3
IRF8	Interferon regulatory factor 8
IL6ST	Interleukin-6 receptor subunit beta
PAX5	Paired box protein Pax-5
ITFG2	KICSTOR complex protein ITFG2
POLR3F	DNA-directed RNA polymerase III subunit RPC6
PPP2R3C	Serine/threonine-protein phosphatase 2A regulatory subunit B'' subunit gamma
RAB24	Ras-related protein Rab-24
IRF6	Interferon regulatory factor 6
ROMO1	Reactive oxygen species modulator 1
MUC3A	Mucin-3A
IFIT3	Interferon-induced protein with tetratricopeptide repeats 3
AIM2	Interferon-inducible protein AIM2
CD44	CD44 antigen
FFAR3	Free fatty acid receptor 3
TNFRSF13B	Tumor necrosis factor receptor superfamily member 13B
PSMA7	Proteasome subunit alpha type-7
POLR3A	DNA-directed RNA polymerase III subunit RPC1
GDI2	Rab GDP dissociation inhibitor beta
LEAP2	Liver-expressed antimicrobial peptide 2
IGLJ1	Immunoglobulin lambda joining 1
UBASH3A	Ubiquitin-associated and SH3 domain-containing protein A
H2BFS	Histone H2B type F-S
MNDA	Myeloid cell nuclear differentiation antigen
APEH	Acylamino-acid-releasing enzyme
LCP1	Plastin-2
IGKJ1	Immunoglobulin kappa joining 1
HLA-DOB	HLA class II histocompatibility antigen, DO beta chain
HLA-E	HLA class I histocompatibility antigen, alpha chain E
ERP44	Endoplasmic reticulum resident protein 44
PRG2	Bone marrow proteoglycan
OSM	Oncostatin-M
IL2	Interleukin-2
PTAFR	Platelet-activating factor receptor
FCGRT	IgG receptor FcRn large subunit p51
RAB10	Ras-related protein Rab-10
ARPC5	Actin-related protein 2/3 complex subunit 5
CYP27B1	25-hydroxyvitamin D-1 alpha hydroxylase, mitochondrial
C4BPA	C4b-binding protein alpha chain
TNFRSF10C	Tumor necrosis factor receptor superfamily member 10C
RORA	Nuclear receptor ROR-alpha
GAS6	Growth arrest-specific protein 6
MPO	Myeloperoxidase
ISG15	Ubiquitin-like protein ISG15
CFI	Complement factor I
SERPING1	Plasma protease C1 inhibitor
TNFRSF25	Tumor necrosis factor receptor superfamily member 25
IL5	Interleukin-5
IL4	Interleukin-4
S100A8	Protein S100-A8
ITGB2	Integrin beta-2
FGL2	Fibroleukin
TCN1	Transcobalamin-1
CLEC4A	C-type lectin domain family 4 member A
NLRC4	NLR family CARD domain-containing protein 4
CD19	B-lymphocyte antigen CD19
HLA-DPA1	HLA class II histocompatibility antigen, DP alpha 1 chain
TRGC2	T-cell receptor gamma-2 chain C region
CR2	Complement receptor type 2
SLPI	Antileukoproteinase
USP18	Ubl carboxyl-terminal hydrolase 18
PSMC5	26S proteasome regulatory subunit 8
PSMC1	26S proteasome regulatory subunit 4
APP	Amyloid-beta A4 protein
EZR	Ezrin
ACPP	Prostatic acid phosphatase
FCER1G	High affinity immunoglobulin epsilon receptor subunit gamma
ARG1	Arginase-1
NLRP1	NACHT, LRR and PYD domains-containing protein 1
CD6	T-cell differentiation antigen CD6
PTK2B	Protein-tyrosine kinase 2-beta
TRIM15	Tripartite motif-containing protein 15
TRIM5	Tripartite motif-containing protein 5
TRIM25	E3 ubiquitin/ISG15 ligase TRIM25
ADGRE1	Adhesion G protein-coupled receptor E1
PARP14	Poly [ADP-ribose] polymerase 14
IFNA16	Interferon alpha-16
IFNA4	Interferon alpha-4
IFNA6	Interferon alpha-6
PGLYRP3	Peptidoglycan recognition protein 3
SCAMP1	Secretory carrier-associated membrane protein 1
IFNW1	Interferon omega-1
EBI3	Interleukin-27 subunit beta
SIGLEC10	Sialic acid-binding Ig-like lectin 10
DYNC1H1	Cytoplasmic dynein 1 heavy chain 1
PSMA6	Proteasome subunit alpha type-6
RPL13A	60S ribosomal protein L13a
B4GALT1	Beta-1,4-galactosyltransferase 1
ARSA	Arylsulfatase A
IFNGR1	Interferon gamma receptor 1
EXOSC3	Exosome complex component RRP40
TRIM21	E3 ubiquitin-protein ligase TRIM21
IL9	Interleukin-9
TRGV3	T cell receptor gamma variable 3
MAP2K4	Dual specificity mitogen-activated protein kinase kinase 4
MAPK9	Mitogen-activated protein kinase 9
MAPK8	Mitogen-activated protein kinase 8
DOCK1	Dedicator of cytokinesis protein 1
MICA	MHC class I polypeptide-related sequence A
MICB	MHC class I polypeptide-related sequence B
SNAP25	Synaptosomal-associated protein 25
MLEC	Malectin
SCRIB	Protein scribble homolog
RNF19B	E3 ubiquitin-protein ligase RNF19B
ADAMDEC1	ADAM DEC1
UBD	Ubiquitin D
EP300	Histone acetyltransferase p300
IL18	Interleukin-18
PDZD11	PDZ domain-containing protein 11
IGKV3D-11	Immunoglobulin kappa variable 3D-11
PSMF1	Proteasome inhibitor PI31 subunit
PSMB10	Proteasome subunit beta type-10
IFI27	Interferon alpha-inducible protein 27, mitochondrial
CPN1	Carboxypeptidase N catalytic chain
RAC2	Ras-related C3 botulinum toxin substrate 2
ABR	Active breakpoint cluster region-related protein
PVR	Poliovirus receptor
ANPEP	Aminopeptidase N
NFATC3	Nuclear factor of activated T-cells, cytoplasmic 3
TNFSF10	Tumor necrosis factor ligand superfamily member 10
DLG1	Disks large homolog 1
DUSP22	Dual specificity protein phosphatase 22
FOXF1	Forkhead box protein F1
ERAP2	Endoplasmic reticulum aminopeptidase 2
TRAF2	TNF receptor-associated factor 2
KLRB1	Killer cell lectin-like receptor subfamily B member 1
PTPRJ	Receptor-type tyrosine-protein phosphatase eta
LRMP	Lymphoid-restricted membrane protein
ILF2	Interleukin enhancer-binding factor 2
CCL15-CCL14	C-C motif chemokine
IGKV1D-13	Immunoglobulin kappa variable 1D-13
PRDX6	Peroxiredoxin-6
SH2D1B	SH2 domain-containing protein 1B
APOL1	Apolipoprotein L1
DSG1	Desmoglein-1
TNFSF11	Tumor necrosis factor ligand superfamily member 11
OPRM1	Mu-type opioid receptor
TNFRSF10B	Tumor necrosis factor receptor superfamily member 10B
PLA2G1B	Phospholipase A2
NFKB1	Nuclear factor NF-kappa-B p105 subunit
MAP2K7	Dual specificity mitogen-activated protein kinase kinase 7
RIOK3	Serine/threonine-protein kinase RIO3
ALDOA	Fructose-bisphosphate aldolase A
APAF1	Apoptotic protease-activating factor 1
CSTB	Cystatin-B
ANXA1	Annexin A1
LRP1	Prolow-density lipoprotein receptor-related protein 1
CRIP1	Cysteine-rich protein 1
NCK1	Cytoplasmic protein NCK1
CD8B2	Putative T-cell surface glycoprotein CD8 beta-2 chain
IGLV5-52	Immunoglobulin lambda variable 5-52
MNX1	Motor neuron and pancreas homeobox protein 1
IGKV2D-26	Immunoglobulin kappa variable 2D-26
FPR2	N-formyl peptide receptor 2
TNK2	Activated CDC42 kinase 1
CEACAM1	Carcinoembryonic antigen-related cell adhesion molecule 1
IRF2	Interferon regulatory factor 2
ABCA13	ATP-binding cassette sub-family A member 13
CD24	Signal transducer CD24
C6	Complement component C6
IGHV1-69D	Immunoglobulin heavy variable 1-69D
EEF2	Elongation factor 2
CXCR2	C-X-C chemokine receptor type 2
CXCR1	C-X-C chemokine receptor type 1
HRH2	Histamine H2 receptor
ACOD1	Cis-aconitate decarboxylase
CD63	CD63 antigen
IGKV1D-8	Immunoglobulin kappa variable 1D-8
ITGA4	Integrin alpha-4
IGKV3D-15	Immunoglobulin kappa variable 3D-15
IGHV4-30-2	Immunoglobulin heavy variable 4-30-2
BRI3	Brain protein I3
IGHV3-49	Immunoglobulin heavy variable 3-49
IGHV1-45	Immunoglobulin heavy variable 1-45
IGLV5-45	Immunoglobulin lambda variable 5-45
NDFIP1	NEDD4 family-interacting protein 1
IGLV3-32	Immunoglobulin lambda variable 3-32 (non-functional)
CCL18	C-C motif chemokine 18
CCL23	C-C motif chemokine 23
CD244	Natural killer cell receptor 2B4
ADAM10	Disintegrin and metalloproteinase domain-containing protein 10
CSF2	Granulocyte-macrophage colony-stimulating factor
SFTPD	Pulmonary surfactant-associated protein D
ENPP3	Ectonucleotide pyrophosphatase/phosphodiesterase family member 3
SERPINB6	Serpin B6
PHB	Prohibitin
NOS2	Nitric oxide synthase, inducible
URS0000338542_9606	Homo sapiens (human) microRNA hsa-miR-155-5p
URS000039ED8D_9606	Homo sapiens (human) microRNA hsa-miR-21-5p
MST1R	Macrophage-stimulating protein receptor
SLC11A1	Natural resistance-associated macrophage protein 1
CD164	Sialomucin core protein 24
DEFB124	Beta-defensin 124
S1PR4	Sphingosine 1-phosphate receptor 4
IGSF6	Immunoglobulin superfamily member 6
CD160	CD160 antigen
CX3CR1	CX3C chemokine receptor 1
NCR2	Natural cytotoxicity triggering receptor 2
SNCA	Alpha-synuclein
CCL4L1	C-C motif chemokine 4-like
CHGA	Chromogranin-A
C7	Complement component C7
EOMES	Eomesodermin homolog
PIK3CA	Phosphatidylinositol 4,5-bisphosphate 3-kinase catalytic subunit alpha isoform
TNIP2	TNFAIP3-interacting protein 2
IL33	Interleukin-33
CHRNB4	Neuronal acetylcholine receptor subunit beta-4
IFNAR1	Interferon alpha/beta receptor 1
DYNC1LI1	Cytoplasmic dynein 1 light intermediate chain 1
PSME4	Proteasome activator complex subunit 4
CRTAM	Cytotoxic and regulatory T-cell molecule
PRKCB	Protein kinase C beta type
SNAP29	Synaptosomal-associated protein 29
KPNB1	Importin subunit beta-1
PSMD10	26S proteasome non-ATPase regulatory subunit 10
BCL2	Apoptosis regulator Bcl-2
KIR2DS1	Killer cell immunoglobulin-like receptor 2DS1
KIR2DS5	Killer cell immunoglobulin-like receptor 2DS5
KIR3DS1	Killer cell immunoglobulin-like receptor 3DS1
TSPAN14	Tetraspanin-14
MAP2K6	Dual specificity mitogen-activated protein kinase kinase 6
SIRT1	NAD-dependent protein deacetylase sirtuin-1
ORAI1	Calcium release-activated calcium channel protein 1
YTHDF2	YTH domain-containing family protein 2
NUB1	NEDD8 ultimate buster 1
FES	Tyrosine-protein kinase Fes/Fps
MAP3K7	Mitogen-activated protein kinase kinase kinase 7
C8A	Complement component C8 alpha chain
SLAMF7	SLAM family member 7
SUSD2	Sushi domain-containing protein 2
MAPK3	Mitogen-activated protein kinase 3
SVIP	Small VCP/p97-interacting protein
SWAP70	Switch-associated protein 70
WASF2	Wiskott-Aldrich syndrome protein family member 2
ICOS	Inducible T-cell costimulator
PSMB1	Proteasome subunit beta type-1
CCL27	C-C motif chemokine 27
C4B	Complement C4-B
C4A	Complement C4-A
LILRB4	Leukocyte immunoglobulin-like receptor subfamily B member 4
MUC1	Mucin-1
RIPK3	Receptor-interacting serine/threonine-protein kinase 3
DSP	Desmoplakin
CYFIP2	Cytoplasmic FMR1-interacting protein 2
RAG1	V(D)J recombination-activating protein 1
RNF31	E3 ubiquitin-protein ligase RNF31
RPS6	40S ribosomal protein S6
ATP7A	Copper-transporting ATPase 1
ST6GAL1	Beta-galactoside alpha-2,6-sialyltransferase 1
RNF125	E3 ubiquitin-protein ligase RNF125
POLR3H	DNA-directed RNA polymerase III subunit RPC8
STAT6	Signal transducer and activator of transcription 6
STAT1	Signal transducer and activator of transcription 1-alpha/beta
EPPIN	Eppin
CREG1	Protein CREG1
IL17B	Interleukin-17B
FCN3	Ficolin-3
CTSA	Lysosomal protective protein
BMP6	Bone morphogenetic protein 6
PSTPIP1	Proline-serine-threonine phosphatase-interacting protein 1
HK3	Hexokinase-3
TGFB3	Transforming growth factor beta-3
TBK1	Serine/threonine-protein kinase TBK1
IL19	Interleukin-19
FCRLB	Fc receptor-like B
MOSPD2	Motile sperm domain-containing protein 2
TNFSF14	Tumor necrosis factor ligand superfamily member 14
IL36A	Interleukin-36 alpha
LAMTOR3	Ragulator complex protein LAMTOR3
SMAD6	Mothers against decapentaplegic homolog 6
VAV2	Guanine nucleotide exchange factor VAV2
LILRB1	Leukocyte immunoglobulin-like receptor subfamily B member 1
WIPF1	WAS/WASL-interacting protein family member 1
TNFSF12	Tumor necrosis factor ligand superfamily member 12
COL17A1	Collagen alpha-1(XVII) chain
GPR183	G-protein coupled receptor 183
CCR7	C-C chemokine receptor type 7
CCR1	C-C chemokine receptor type 1
VIPR1	Vasoactive intestinal polypeptide receptor 1
C4BPB	C4b-binding protein beta chain
MSH6	DNA mismatch repair protein Msh6
CYB5R3	NADH-cytochrome b5 reductase 3
IMPDH1	Inosine-5'-monophosphate dehydrogenase 1
MARCO	Macrophage receptor MARCO
GRB2	Growth factor receptor-bound protein 2
UBA52	Ubiquitin-60S ribosomal protein L40
RPS27A	Ubiquitin-40S ribosomal protein S27a
REL	Proto-oncogene c-Rel
AKAP8	A-kinase anchor protein 8
AGA	N(4)-(beta-N-acetylglucosaminyl)-L-asparaginase
TBKBP1	TANK-binding kinase 1-binding protein 1
MUC17	Mucin-17
FKBP1A	Peptidyl-prolyl cis-trans isomerase FKBP1A
GCSAML	Germinal center-associated signaling and motility-like protein
APOBEC3B	DNA dC->dU-editing enzyme APOBEC-3B
PPIA	Peptidyl-prolyl cis-trans isomerase A
CD247	T-cell surface glycoprotein CD3 zeta chain
FAF2	FAS-associated factor 2
DNASE1L1	Deoxyribonuclease-1-like 1
CD300A	CMRF35-like molecule 8
DEFB105A	Beta-defensin 105
DMBT1	Deleted in malignant brain tumors 1 protein
RFTN2	Raftlin-2
CCL14	C-C motif chemokine 14
ECM1	Extracellular matrix protein 1
NME2	Nucleoside diphosphate kinase B
MUC12	Mucin-12
CXCL5	C-X-C motif chemokine 5
CCL1	C-C motif chemokine 1
GRAP2	GRB2-related adapter protein 2
HLA-G	HLA class I histocompatibility antigen, alpha chain G
CLCF1	Cardiotrophin-like cytokine factor 1
PILRA	Paired immunoglobulin-like type 2 receptor alpha
PILRB	Paired immunoglobulin-like type 2 receptor beta
ATP6AP2	Renin receptor
CEBPB	CCAAT/enhancer-binding protein beta
CXCL16	C-X-C motif chemokine 16
IL10	Interleukin-10
GPATCH3	G patch domain-containing protein 3
CLU	Clusterin
CD1C	T-cell surface glycoprotein CD1c
CD1B	T-cell surface glycoprotein CD1b
HCST	Hematopoietic cell signal transducer
IL13RA2	Interleukin-13 receptor subunit alpha-2
AHSG	Alpha-2-HS-glycoprotein
PRKACA	cAMP-dependent protein kinase catalytic subunit alpha
FBXW11	F-box/WD repeat-containing protein 11
LAMTOR1	Ragulator complex protein LAMTOR1
GPR32	Probable G-protein coupled receptor 32
ATG5	Autophagy protein 5
RBPJ	Recombining binding protein suppressor of hairless
PSME1	Proteasome activator complex subunit 1
SUSD4	Sushi domain-containing protein 4
CTSZ	Cathepsin Z
FYB2	FYN-binding protein 2
CCL26	C-C motif chemokine 26
CARD9	Caspase recruitment domain-containing protein 9
STOML2	Stomatin-like protein 2, mitochondrial
DEFB114	Beta-defensin 114
VSIG4	V-set and immunoglobulin domain-containing protein 4
DAB2IP	Disabled homolog 2-interacting protein
FBXO9	F-box only protein 9
ELF1	ETS-related transcription factor Elf-1
MS4A3	Membrane-spanning 4-domains subfamily A member 3
SIGLEC7	Sialic acid-binding Ig-like lectin 7
C5AR2	C5a anaphylatoxin chemotactic receptor 2
CAPN1	Calpain-1 catalytic subunit
NAPRT	Nicotinate phosphoribosyltransferase
LEF1	Lymphoid enhancer-binding factor 1
C8G	Complement component C8 gamma chain
VPREB1	Immunoglobulin iota chain
C8B	Complement component C8 beta chain
ANXA2	Annexin A2
CAMK4	Calcium/calmodulin-dependent protein kinase type IV
IL17A	Interleukin-17A
SERINC3	Serine incorporator 3
IL3	Interleukin-3
RAB27A	Ras-related protein Rab-27A
ASAH1	Acid ceramidase
RAB7A	Ras-related protein Rab-7a
RAB5C	Ras-related protein Rab-5C
ADAM8	Disintegrin and metalloproteinase domain-containing protein 8
SIRPA	Tyrosine-protein phosphatase non-receptor type substrate 1
KDM5D	Lysine-specific demethylase 5D
GZMM	Granzyme M
SLC26A6	Solute carrier family 26 member 6
NCF1	Neutrophil cytosol factor 1
AP1M1	AP-1 complex subunit mu-1
PAXIP1	PAX-interacting protein 1
CFHR5	Complement factor H-related protein 5
TLR10	Toll-like receptor 10
DEFB123	Beta-defensin 123
PLA2G2A	Phospholipase A2, membrane associated
C1S	Complement C1s subcomponent
DPP8	Dipeptidyl peptidase 8
KCNN4	Intermediate conductance calcium-activated potassium channel protein 4
MEFV	Pyrin
FFAR2	Free fatty acid receptor 2
TAPBP	Tapasin
BIRC2	Baculoviral IAP repeat-containing protein 2
PDPK1	3-phosphoinositide-dependent protein kinase 1
SEMG1	Semenogelin-1
BIRC3	Baculoviral IAP repeat-containing protein 3
S100B	Protein S100-B
SOCS1	Suppressor of cytokine signaling 1
CALML5	Calmodulin-like protein 5
IL18R1	Interleukin-18 receptor 1
MADCAM1	Mucosal addressin cell adhesion molecule 1
TNK1	Non-receptor tyrosine-protein kinase TNK1
PRKCH	Protein kinase C eta type
NFATC2	Nuclear factor of activated T-cells, cytoplasmic 2
FZD5	Frizzled-5
ROCK1	Rho-associated protein kinase 1
CD274	Programmed cell death 1 ligand 1
NCKIPSD	NCK-interacting protein with SH3 domain
CD3D	T-cell surface glycoprotein CD3 delta chain
CD74	HLA class II histocompatibility antigen gamma chain
ADAM15	Disintegrin and metalloproteinase domain-containing protein 15
PDAP1	28 kDa heat- and acid-stable phosphoprotein
C1RL	Complement C1r subcomponent-like protein
A1BG	Alpha-1B-glycoprotein
THY1	Thy-1 membrane glycoprotein
NOP53	Ribosome biogenesis protein NOP53
CRHR1	Corticotropin-releasing factor receptor 1
UBE2V1	Ubiquitin-conjugating enzyme E2 variant 1
BAG6	Large proline-rich protein BAG6
TXK	Tyrosine-protein kinase TXK
PROS1	Vitamin K-dependent protein S
MATK	Megakaryocyte-associated tyrosine-protein kinase
IRAK1BP1	Interleukin-1 receptor-associated kinase 1-binding protein 1
GPX1	Glutathione peroxidase 1
PSMD5	26S proteasome non-ATPase regulatory subunit 5
RPS6KA5	Ribosomal protein S6 kinase alpha-5
DOCK11	Dedicator of cytokinesis protein 11
CRCP	DNA-directed RNA polymerase III subunit RPC9
CD28	T-cell-specific surface glycoprotein CD28
PRKRA	Interferon-inducible double-stranded RNA-dependent protein kinase activator A
SKAP2	Src kinase-associated phosphoprotein 2
KIT	Mast/stem cell growth factor receptor Kit
PF4V1	Platelet factor 4 variant
THOC1	THO complex subunit 1
BTK	Tyrosine-protein kinase BTK
MUC6	Mucin-6
SAA1	Serum amyloid A-1 protein
CD84	SLAM family member 5
TSPAN6	Tetraspanin-6
TNFRSF21	Tumor necrosis factor receptor superfamily member 21
REG3A	Regenerating islet-derived protein 3-alpha
PGLYRP1	Peptidoglycan recognition protein 1
PTPN11	Tyrosine-protein phosphatase non-receptor type 11
PNP	Purine nucleoside phosphorylase
CDA	Cytidine deaminase
CXCR5	C-X-C chemokine receptor type 5
RPS19	40S ribosomal protein S19
SDHAF4	Succinate dehydrogenase assembly factor 4, mitochondrial
DHX58	Probable ATP-dependent RNA helicase DHX58
TRAF3IP2	Adapter protein CIKS
NAIP	Baculoviral IAP repeat-containing protein 1
AP1G1	AP-1 complex subunit gamma-1
CLEC2D	C-type lectin domain family 2 member D
NHLRC3	NHL repeat-containing protein 3
PELI1	E3 ubiquitin-protein ligase pellino homolog 1
IL18BP	Interleukin-18-binding protein
CD93	Complement component C1q receptor
C12orf4	Protein C12orf4
OAS1	2'-5'-oligoadenylate synthase 1
UBQLN1	Ubiquilin-1
HEXB	Beta-hexosaminidase subunit beta
SPINK5	Serine protease inhibitor Kazal-type 5
FCGR2A	Low affinity immunoglobulin gamma Fc region receptor II-a
FCGR1A	High affinity immunoglobulin gamma Fc receptor I
TNFRSF1B	Tumor necrosis factor receptor superfamily member 1B
CD48	CD48 antigen
JUN	Transcription factor AP-1
CLEC12B	C-type lectin domain family 12 member B
ATP6V0A1	V-type proton ATPase 116 kDa subunit a isoform 1
NR1D1	Nuclear receptor subfamily 1 group D member 1
IGLC7	Immunoglobulin lambda constant 7
DAPK3	Death-associated protein kinase 3
IL1RAP	Interleukin-1 receptor accessory protein
SASH3	SAM and SH3 domain-containing protein 3
ADORA2B	Adenosine receptor A2b
IL23A	Interleukin-23 subunit alpha
RNASE6	Ribonuclease K6
PSMB2	Proteasome subunit beta type-2
PSMB3	Proteasome subunit beta type-3
XBP1	X-box-binding protein 1
FLOT1	Flotillin-1
PFKL	ATP-dependent 6-phosphofructokinase, liver type
ICAM5	Intercellular adhesion molecule 5
CPNE3	Copine-3
ACKR4	Atypical chemokine receptor 4
MMP25	Matrix metalloproteinase-25
PIAS1	E3 SUMO-protein ligase PIAS1
PAK3	Serine/threonine-protein kinase PAK 3
ARPC4	Actin-related protein 2/3 complex subunit 4
DNAJC5	DnaJ homolog subfamily C member 5
SRMS	Tyrosine-protein kinase Srms
RAB9B	Ras-related protein Rab-9B
HSP90AA1	Heat shock protein HSP 90-alpha
MRC1	Macrophage mannose receptor 1
MMP8	Neutrophil collagenase
PDCD1LG2	Programmed cell death 1 ligand 2
SAMSN1	SAM domain-containing protein SAMSN-1
TYK2	Non-receptor tyrosine-protein kinase TYK2
PML	Protein PML
CADM1	Cell adhesion molecule 1
POU2F2	POU domain, class 2, transcription factor 2
CMTM3	CKLF-like MARVEL transmembrane domain-containing protein 3
LY75	Lymphocyte antigen 75
SERPINB3	Serpin B3
NBEAL2	Neurobeachin-like protein 2
TRIM14	Tripartite motif-containing protein 14
IKBKE	Inhibitor of nuclear factor kappa-B kinase subunit epsilon
PHPT1	14 kDa phosphohistidine phosphatase
APOBEC3C	DNA dC->dU-editing enzyme APOBEC-3C
CYSLTR2	Cysteinyl leukotriene receptor 2
GZMA	Granzyme A
GCNT3	Beta-1,3-galactosyl-O-glycosyl-glycoprotein beta-1,6-N-acetylglucosaminyltransferase 3
CD58	Lymphocyte function-associated antigen 3
CTSB	Cathepsin B
H0Y858	Uncharacterized protein
SLA2	Src-like-adapter 2
EPRS	Bifunctional glutamate/proline--tRNA ligase
CPN2	Carboxypeptidase N subunit 2
RELB	Transcription factor RelB
GBP6	Guanylate-binding protein 6
CCL28	C-C motif chemokine 28
GNLY	Granulysin
CASP1	Caspase-1
IL12B	Interleukin-12 subunit beta
MUC2	Mucin-2
IL12A	Interleukin-12 subunit alpha
LIG4	DNA ligase 4
CD300LF	CMRF35-like molecule 1
HAVCR2	Hepatitis A virus cellular receptor 2
PSMB7	Proteasome subunit beta type-7
VAMP2	Vesicle-associated membrane protein 2
GYG1	Glycogenin-1
ADGRG3	Adhesion G protein-coupled receptor G3
SIRT2	NAD-dependent protein deacetylase sirtuin-2
S100A7	Protein S100-A7
IRAK1	Interleukin-1 receptor-associated kinase 1
RAC1	Ras-related C3 botulinum toxin substrate 1
MMP2	72 kDa type IV collagenase
CORO1A	Coronin-1A
KIR3DL2	Killer cell immunoglobulin-like receptor 3DL2
IQGAP1	Ras GTPase-activating-like protein IQGAP1
BPIFB1	BPI fold-containing family B member 1
IFNA2	Interferon alpha-2
IFNA21	Interferon alpha-21
IFNA5	Interferon alpha-5
IFNA17	Interferon alpha-17
IFNB1	Interferon beta
SSC5D	Soluble scavenger receptor cysteine-rich domain-containing protein SSC5D
RNASE8	Ribonuclease 8
PRKD1	Serine/threonine-protein kinase D1
PDCD1	Programmed cell death protein 1
GRN	Granulins
AGER	Advanced glycosylation end product-specific receptor
ANKHD1	Ankyrin repeat and KH domain-containing protein 1
RETN	Resistin
CXCL12	Stromal cell-derived factor 1
GLIPR1	Glioma pathogenesis-related protein 1
PGRMC1	Membrane-associated progesterone receptor component 1
MYO10	Unconventional myosin-X
TRPM2	Transient receptor potential cation channel subfamily M member 2
ATOX1	Copper transport protein ATOX1
SIRPB1	Signal-regulatory protein beta-1
LAX1	Lymphocyte transmembrane adapter 1
PSMD9	26S proteasome non-ATPase regulatory subunit 9
PSMD12	26S proteasome non-ATPase regulatory subunit 12
NECTIN2	Nectin-2
FASLG	Tumor necrosis factor ligand superfamily member 6
TNFRSF10A	Tumor necrosis factor receptor superfamily member 10A
SPN	Leukosialin
TRIM59	Tripartite motif-containing protein 59
CBFB	Core-binding factor subunit beta
SPPL2A	Signal peptide peptidase-like 2A
SPPL2B	Signal peptide peptidase-like 2B
SPPL3	Signal peptide peptidase-like 3
PLEKHO2	Pleckstrin homology domain-containing family O member 2
P2RX1	P2X purinoceptor 1
ZFPM1	Zinc finger protein ZFPM1
SKAP1	Src kinase-associated phosphoprotein 1
CD200R1	Cell surface glycoprotein CD200 receptor 1
AHCY	Adenosylhomocysteinase
TNFSF4	Tumor necrosis factor ligand superfamily member 4
CLNK	Cytokine-dependent hematopoietic cell linker
VTCN1	V-set domain-containing T-cell activation inhibitor 1
TCIRG1	V-type proton ATPase 116 kDa subunit a isoform 3
DEFB128	Beta-defensin 128
IFI30	Gamma-interferon-inducible lysosomal thiol reductase
HLA-H	Putative HLA class I histocompatibility antigen, alpha chain H
IFNK	Interferon kappa
IGHD	Immunoglobulin heavy constant delta
IGHA2	Immunoglobulin heavy constant alpha 2
SPG21	Maspardin
IGHG4	Immunoglobulin heavy constant gamma 4
IGHG3	Immunoglobulin heavy constant gamma 3
IGHG2	Immunoglobulin heavy constant gamma 2
IGHE	Immunoglobulin heavy constant epsilon
CCL4	C-C motif chemokine 4
TRAC	T-cell receptor alpha chain C region
IL7	Interleukin-7
CD14	Monocyte differentiation antigen CD14
ANKRD17	Ankyrin repeat domain-containing protein 17
TLR4	Toll-like receptor 4
HUWE1	E3 ubiquitin-protein ligase HUWE1
IL1R1	Interleukin-1 receptor type 1
IGHV4-59	Immunoglobulin heavy variable 4-59
IGHV4-39	Immunoglobulin heavy variable 4-39
S100A12	Protein S100-A12
CD177	CD177 antigen
PSMD11	26S proteasome non-ATPase regulatory subunit 11
CD81	CD81 antigen
DEFB1	Beta-defensin 1
TMEM173	Stimulator of interferon genes protein
SP100	Nuclear autoantigen Sp-100
KCMF1	E3 ubiquitin-protein ligase KCMF1
FCGR1B	High affinity immunoglobulin gamma Fc receptor IB
RAB44	Ras-related protein Rab-44
JAK1	Tyrosine-protein kinase JAK1
KLRF1	Killer cell lectin-like receptor subfamily F member 1
GCSAM	Germinal center-associated signaling and motility protein
MILR1	Allergin-1
LGR4	Leucine-rich repeat-containing G-protein coupled receptor 4
MSRB1	Methionine-R-sulfoxide reductase B1
LILRA3	Leukocyte immunoglobulin-like receptor subfamily A member 3
MRGPRX2	Mas-related G-protein coupled receptor member X2
FCRL3	Fc receptor-like protein 3
GSTP1	Glutathione S-transferase P
NLRP3	NACHT, LRR and PYD domains-containing protein 3
CPPED1	Serine/threonine-protein phosphatase CPPED1
CD276	CD276 antigen
TNFRSF13C	Tumor necrosis factor receptor superfamily member 13C
FOLR3	Folate receptor gamma
GCA	Grancalcin
MUC15	Mucin-15
IKBKAP	Elongator complex protein 1
TLR5	Toll-like receptor 5
TLR2	Toll-like receptor 2
TNFSF15	Tumor necrosis factor ligand superfamily member 15
CTSL	Cathepsin L1
STAT3	Signal transducer and activator of transcription 3
EDN1	Endothelin-1
RFX1	MHC class II regulatory factor RFX1
HLX	H2.0-like homeobox protein
ICAM4	Intercellular adhesion molecule 4
ENPP1	Ectonucleotide pyrophosphatase/phosphodiesterase family member 1
HERC5	E3 ISG15--protein ligase HERC5
ITGB1	Integrin beta-1
MVP	Major vault protein
IRAK2	Interleukin-1 receptor-associated kinase-like 2
IGKV2-29	Immunoglobulin kappa variable 2-29
LILRB5	Leukocyte immunoglobulin-like receptor subfamily B member 5
HLA-DQB2	HLA class II histocompatibility antigen, DQ beta 2 chain
LILRA1	Leukocyte immunoglobulin-like receptor subfamily A member 1
FCGR3B	Low affinity immunoglobulin gamma Fc region receptor III-B
HSPA1B	Heat shock 70 kDa protein 1B
NLRP2B	NLR family pyrin domain-containing protein 2B
JAK3	Tyrosine-protein kinase JAK3
HGSNAT	Heparan-alpha-glucosaminide N-acetyltransferase
APOBEC3D	DNA dC->dU-editing enzyme APOBEC-3D
PRG3	Proteoglycan 3
POLR3K	DNA-directed RNA polymerase III subunit RPC10
ENPP4	Bis(5'-adenosyl)-triphosphatase ENPP4
RAB7B	Ras-related protein Rab-7b
ZBP1	Z-DNA-binding protein 1
VAPA	Vesicle-associated membrane protein-associated protein A
CD86	T-lymphocyte activation antigen CD86
KLK5	Kallikrein-5
PTPN22	Tyrosine-protein phosphatase non-receptor type 22
LAMTOR2	Ragulator complex protein LAMTOR2
ATP8A1	Phospholipid-transporting ATPase IA
VNN1	Pantetheinase
C3AR1	C3a anaphylatoxin chemotactic receptor
ACTR1B	Beta-centractin
NFKBIA	NF-kappa-B inhibitor alpha
PNMA1	Paraneoplastic antigen Ma1
ZBTB1	Zinc finger and BTB domain-containing protein 1
RNASE2	Non-secretory ribonuclease
CCL3	C-C motif chemokine 3
CXCL8	Interleukin-8
GZMB	Granzyme B
RFTN1	Raftlin
CD40	Tumor necrosis factor receptor superfamily member 5
DEFB110	Beta-defensin 110
DEFB112	Beta-defensin 112
DEFB113	Beta-defensin 113
E7ENX8	Uncharacterized protein
DEFB115	Beta-defensin 115
DEFB116	Beta-defensin 116
DEFB133	Beta-defensin 133
PUM1	Pumilio homolog 1
LSM14A	Protein LSM14 homolog A
DEFB135	Beta-defensin 135
CNIH1	Protein cornichon homolog 1
RNASE7	Ribonuclease 7
HLA-DRB3	HLA class II histocompatibility antigen, DR beta 3 chain
IRF3	Interferon regulatory factor 3
POLR3D	DNA-directed RNA polymerase III subunit RPC4
PSAP	Prosaposin
MYLPF	Myosin regulatory light chain 2, skeletal muscle isoform
CST9	Cystatin-9
TRIM68	E3 ubiquitin-protein ligase TRIM68
APRT	Adenine phosphoribosyltransferase
VAV3	Guanine nucleotide exchange factor VAV3
FOXP1	Forkhead box protein P1
CYP11B1	Cytochrome P450 11B1, mitochondrial
CCT8	T-complex protein 1 subunit theta
TNFAIP8L2	Tumor necrosis factor alpha-induced protein 8-like protein 2
CD46	Membrane cofactor protein
ITCH	E3 ubiquitin-protein ligase Itchy homolog
HTN3	Histatin-3
HTN1	Histatin-1
CLEC4M	C-type lectin domain family 4 member M
PSMC6	26S proteasome regulatory subunit 10B
NDUFC2	NADH dehydrogenase [ubiquinone] 1 subunit C2
RELA	Transcription factor p65
PSMA4	Proteasome subunit alpha type-4
PSMA3	Proteasome subunit alpha type-3
PSMA2	Proteasome subunit alpha type-2
PSMA1	Proteasome subunit alpha type-1
RASGRP1	RAS guanyl-releasing protein 1
CTSS	Cathepsin S
IL18RAP	Interleukin-18 receptor accessory protein
SBNO2	Protein strawberry notch homolog 2
SNX4	Sorting nexin-4
STBD1	Starch-binding domain-containing protein 1
SRP14	Signal recognition particle 14 kDa protein
SLC2A5	Solute carrier family 2, facilitated glucose transporter member 5
MLH1	DNA mismatch repair protein Mlh1
IL6	Interleukin-6
CSNK2B	Casein kinase II subunit beta
HMGN2	Non-histone chromosomal protein HMG-17
CAMP	Cathelicidin antimicrobial peptide
PSMC2	26S proteasome regulatory subunit 7
TLR8	Toll-like receptor 8
MR1	Major histocompatibility complex class I-related gene protein
AZU1	Azurocidin
VAV1	Proto-oncogene vav
PGC	Gastricsin
LIME1	Lck-interacting transmembrane adapter 1
CD33	Myeloid cell surface antigen CD33
BPIFA1	BPI fold-containing family A member 1
RAB18	Ras-related protein Rab-18
CLEC4E	C-type lectin domain family 4 member E
CLEC12A	C-type lectin domain family 12 member A
PYCARD	Apoptosis-associated speck-like protein containing a CARD
DENND1B	DENN domain-containing protein 1B
TRIM11	E3 ubiquitin-protein ligase TRIM11
DEFB129	Beta-defensin 129
DEFB127	Beta-defensin 127
PSEN1	Presenilin-1
RAB6A	Ras-related protein Rab-6A
FCER1A	High affinity immunoglobulin epsilon receptor subunit alpha
DEFB131B	Beta-defensin 131B
RAB3A	Ras-related protein Rab-3A
DBNL	Drebrin-like protein
CHST4	Carbohydrate sulfotransferase 4
BIN2	Bridging integrator 2
BTRC	F-box/WD repeat-containing protein 1A
TINAG	Tubulointerstitial nephritis antigen
TNFSF13B	Tumor necrosis factor ligand superfamily member 13B
CYSLTR1	Cysteinyl leukotriene receptor 1
PRELID1	PRELI domain-containing protein 1, mitochondrial
HPSE	Heparanase
NOD1	Nucleotide-binding oligomerization domain-containing protein 1
IL25	Interleukin-25
KAAG1	Kidney-associated antigen 1
CCL15	C-C motif chemokine 15
GSDMD	Gasdermin-D
TNFRSF10D	Tumor necrosis factor receptor superfamily member 10D
IPO7	Importin-7
ZEB1	Zinc finger E-box-binding homeobox 1
AXL	Tyrosine-protein kinase receptor UFO
TRDC	T-cell receptor delta chain C region
ATG7	Ubiquitin-like modifier-activating enzyme ATG7
RHOG	Rho-related GTP-binding protein RhoG
HMOX2	Heme oxygenase 2
HLA-F	HLA class I histocompatibility antigen, alpha chain F
COMMD3	COMM domain-containing protein 3
CLEC6A	C-type lectin domain family 6 member A
PPARG	Peroxisome proliferator-activated receptor gamma
IL36RN	Interleukin-36 receptor antagonist protein
IGHV4-31	Immunoglobulin heavy variable 4-31
VPREB3	Pre-B lymphocyte protein 3
S100P	Protein S100-P
TXNDC5	Thioredoxin domain-containing protein 5
TAB2	TGF-beta-activated kinase 1 and MAP3K7-binding protein 2
XCL2	Cytokine SCM-1 beta
NFKBIL1	NF-kappa-B inhibitor-like protein 1
SMAD3	Mothers against decapentaplegic homolog 3
GATA3	Trans-acting T-cell-specific transcription factor GATA-3
GATA2	Endothelial transcription factor GATA-2
PAG1	Phosphoprotein associated with glycosphingolipid-enriched microdomains 1
SOCS3	Suppressor of cytokine signaling 3
KRT1	Keratin, type II cytoskeletal 1
MCOLN1	Mucolipin-1
MAP3K1	Mitogen-activated protein kinase kinase kinase 1
NEDD4	E3 ubiquitin-protein ligase NEDD4
LILRA5	Leukocyte immunoglobulin-like receptor subfamily A member 5
CYBA	Cytochrome b-245 light chain
SLAMF1	Signaling lymphocytic activation molecule
LAMP2	Lysosome-associated membrane glycoprotein 2
IGLV3-21	Immunoglobulin lambda variable 3-21
KRT16	Keratin, type I cytoskeletal 16
PRKCE	Protein kinase C epsilon type
SEC14L1	SEC14-like protein 1
EIF2AK4	eIF-2-alpha kinase GCN2
CLEC5A	C-type lectin domain family 5 member A
PRSS3	Trypsin-3
IRF9	Interferon regulatory factor 9
UNC13D	Protein unc-13 homolog D
GPR17	Uracil nucleotide/cysteinyl leukotriene receptor
MYH2	Myosin-2
IGLV1-36	Immunoglobulin lambda variable 1-36
CXADR	Coxsackievirus and adenovirus receptor
IGHV3-15	Immunoglobulin heavy variable 3-15
IGHV3-21	Immunoglobulin heavy variable 3-21
IGHV2-26	Immunoglobulin heavy variable 2-26
IGHV3-73	Immunoglobulin heavy variable 3-73
TRIM62	E3 ubiquitin-protein ligase TRIM62
DLL1	Delta-like protein 1
TDGF1	Teratocarcinoma-derived growth factor 1
HSP90B1	Endoplasmin
MB21D1	Cyclic GMP-AMP synthase
DDX3X	ATP-dependent RNA helicase DDX3X
SP2	Transcription factor Sp2
HLA-DQA1	HLA class II histocompatibility antigen, DQ alpha 1 chain
FCGR3A	Low affinity immunoglobulin gamma Fc region receptor III-A
HLA-DRA	HLA class II histocompatibility antigen, DR alpha chain
HCK	Tyrosine-protein kinase HCK
Q4G0T1	Scavenger receptor cysteine-rich domain-containing protein SCART1
CFH	Complement factor H
GTPBP1	GTP-binding protein 1
CD300E	CMRF35-like molecule 2
TMEM179B	Transmembrane protein 179B
WIPF3	WAS/WASL-interacting protein family member 3
CXCL6	C-X-C motif chemokine 6
CD55	Complement decay-accelerating factor
LY9	T-lymphocyte surface antigen Ly-9
GPLD1	Phosphatidylinositol-glycan-specific phospholipase D
NGFR	Tumor necrosis factor receptor superfamily member 16
ZC3HAV1	Zinc finger CCCH-type antiviral protein 1
RHOF	Rho-related GTP-binding protein RhoF
MUC20	Mucin-20
COL1A2	Collagen alpha-2(I) chain
NLRP9	NACHT, LRR and PYD domains-containing protein 9
IGHV1-2	Immunoglobulin heavy variable 1-2
INPP5D	Phosphatidylinositol 3,4,5-trisphosphate 5-phosphatase 1
LRRC70	Leucine-rich repeat-containing protein 70
EPX	Eosinophil peroxidase
TANK	TRAF family member-associated NF-kappa-B activator
NR4A3	Nuclear receptor subfamily 4 group A member 3
TSC1	Hamartin
PELI3	E3 ubiquitin-protein ligase pellino homolog 3
CCL17	C-C motif chemokine 17
GHDC	GH3 domain-containing protein
RAPGEF1	Rap guanine nucleotide exchange factor 1
GFI1	Zinc finger protein Gfi-1
CKAP4	Cytoskeleton-associated protein 4
SUMO1	Small ubiquitin-related modifier 1
CD1A	T-cell surface glycoprotein CD1a
C1QBP	Complement component 1 Q subcomponent-binding protein, mitochondrial
TNFRSF9	Tumor necrosis factor receptor superfamily member 9
CCL7	C-C motif chemokine 7
BMPR1A	Bone morphogenetic protein receptor type-1A
GAPT	Protein GAPT
CCL8	C-C motif chemokine 8
BST2	Bone marrow stromal antigen 2
BST1	ADP-ribosyl cyclase/cyclic ADP-ribose hydrolase 2
IGF1R	Insulin-like growth factor 1 receptor
INS	Insulin
TNFRSF4	Tumor necrosis factor receptor superfamily member 4
MAN2B1	Lysosomal alpha-mannosidase
SIGLEC14	Sialic acid-binding Ig-like lectin 14
hDV103S1	HDV103S1
hDV102S1	HDV102S1
RNASEL	2-5A-dependent ribonuclease
hADV38S2	HADV38S2
MCEMP1	Mast cell-expressed membrane protein 1
THEMIS	Protein THEMIS
IGHV5-10-1	Immunoglobulin heavy variable 5-10-1
SLC30A8	Zinc transporter 8
HIST1H2BJ	Histone H2B type 1-J
ZAP70	Tyrosine-protein kinase ZAP-70
F6UB75	Uncharacterized protein
STK11IP	Serine/threonine-protein kinase 11-interacting protein
CPNE1	Copine-1
CANT1	Soluble calcium-activated nucleotidase 1
CLC	Galectin-10
TIRAP	Toll/interleukin-1 receptor domain-containing adapter protein
PTGDR2	Prostaglandin D2 receptor 2
SECTM1	Secreted and transmembrane protein 1
HEBP2	Heme-binding protein 2
GSN	Gelsolin
S100A9	Protein S100-A9
IGKV5-2	Immunoglobulin kappa variable 5-2
IGKV2-30	Immunoglobulin kappa variable 2-30
MUCL1	Mucin-like protein 1
PYGL	Glycogen phosphorylase, liver form
ITGAV	Integrin alpha-V
FER	Tyrosine-protein kinase Fer
TRIM38	E3 ubiquitin-protein ligase TRIM38
CCL22	C-C motif chemokine 22
FCN1	Ficolin-1
CMKLR1	Chemokine-like receptor 1
KLRG1	Killer cell lectin-like receptor subfamily G member 1
LTB4R	Leukotriene B4 receptor 1
DEFB121	Beta-defensin 121
CCL19	C-C motif chemokine 19
BLNK	B-cell linker protein
CACTIN	Cactin
KIR2DL4	Killer cell immunoglobulin-like receptor 2DL4
TARM1	T-cell-interacting, activating receptor on myeloid cells protein 1
IKBKG	NF-kappa-B essential modulator
GLA	Alpha-galactosidase A
FCN2	Ficolin-2
SHB	SH2 domain-containing adapter protein B
KLRK1	NKG2-D type II integral membrane protein
KLRC2	NKG2-C type II integral membrane protein
CD300LD	CMRF35-like molecule 4
FYN	Tyrosine-protein kinase Fyn
LCK	Tyrosine-protein kinase Lck
PYDC1	Pyrin domain-containing protein 1
MFNG	Beta-1,3-N-acetylglucosaminyltransferase manic fringe
RNASET2	Ribonuclease T2
CFHR2	Complement factor H-related protein 2
SDCBP	Syntenin-1
JAG1	Protein jagged-1
IGHV3-64D	Immunoglobulin heavy variable 3-64D
CAMK2B	Calcium/calmodulin-dependent protein kinase type II subunit beta
CAMK2G	Calcium/calmodulin-dependent protein kinase type II subunit gamma
CD80	T-lymphocyte activation antigen CD80
IGLC6	Immunoglobulin lambda constant 6
IRF5	Interferon regulatory factor 5
ADARB1	Double-stranded RNA-specific editase 1
CARD11	Caspase recruitment domain-containing protein 11
BTLA	B- and T-lymphocyte attenuator
IGHV3-9	Immunoglobulin heavy variable 3-9
IGHV3-7	Immunoglobulin heavy variable 3-7
DEFB119	Beta-defensin 119
CLEC7A	C-type lectin domain family 7 member A
DEFB125	Beta-defensin 125
IGHV3-33	Immunoglobulin heavy variable 3-33
IGHV3-30	Immunoglobulin heavy variable 3-30
IGHV3-53	Immunoglobulin heavy variable 3-53
IGHV3-13	Immunoglobulin heavy variable 3-13
IGHV3-23	Immunoglobulin heavy variable 3-23
IGHV3-48	Immunoglobulin heavy variable 3-48
IGHV3-11	Immunoglobulin heavy variable 3-11
ADGRE3	Adhesion G protein-coupled receptor E3
BCAR1	Breast cancer anti-estrogen resistance protein 1
IGHV1-46	Immunoglobulin heavy variable 1-46
MME	Neprilysin
BCL6	B-cell lymphoma 6 protein
P01737	T-cell receptor alpha chain V region PY14
TRBV12-3	T-cell receptor beta chain V region YT35
CD8A	T-cell surface glycoprotein CD8 alpha chain
IGLV3-25	Immunoglobulin lambda variable 3-25
IGLV3-1	Immunoglobulin lambda variable 3-1
IGLV3-19	Immunoglobulin lambda variable 3-19
TNFRSF8	Tumor necrosis factor receptor superfamily member 8
CD38	ADP-ribosyl cyclase/cyclic ADP-ribose hydrolase 1
IGLV2-8	Immunoglobulin lambda variable 2-8
IGLV2-11	Immunoglobulin lambda variable 2-11
IGLV2-23	Immunoglobulin lambda variable 2-23
IGLV2-14	Immunoglobulin lambda variable 2-14
COMMD9	COMM domain-containing protein 9
IGLV1-51	Immunoglobulin lambda variable 1-51
IGLV1-47	Immunoglobulin lambda variable 1-47
ADAR	Double-stranded RNA-specific adenosine deaminase
RPS3	40S ribosomal protein S3
APBB1IP	Amyloid beta A4 precursor protein-binding family B member 1-interacting protein
EDA	Ectodysplasin-A
IGHV7-4-1	Immunoglobulin heavy variable 7-4-1
CD79A	B-cell antigen receptor complex-associated protein alpha chain
TAB3	TGF-beta-activated kinase 1 and MAP3K7-binding protein 3
BLK	Tyrosine-protein kinase Blk
NFKB2	Nuclear factor NF-kappa-B p100 subunit
LAG3	Lymphocyte activation gene 3 protein
UBC	Polyubiquitin-C
GOLGA7	Golgin subfamily A member 7
PDE12	2',5'-phosphodiesterase 12
PDE4B	cAMP-specific 3',5'-cyclic phosphodiesterase 4B
CXCL9	C-X-C motif chemokine 9
CUEDC2	CUE domain-containing protein 2
IGLV1-44	Immunoglobulin lambda variable 1-44
NFASC	Neurofascin
TICAM2	TIR domain-containing adapter molecule 2
UNG	Uracil-DNA glycosylase
PAFAH1B2	Platelet-activating factor acetylhydrolase IB subunit beta
IGKV3-15	Immunoglobulin kappa variable 3-15
XRCC5	X-ray repair cross-complementing protein 5
LY86	Lymphocyte antigen 86
RAB3D	Ras-related protein Rab-3D
IGKV3-20	Immunoglobulin kappa variable 3-20
IGKV2D-28	Immunoglobulin kappa variable 2D-28
IGKV2D-40	Immunoglobulin kappa variable 2D-40
IGKV1D-12	Immunoglobulin kappa variable 1D-12
IGKV1-5	Immunoglobulin kappa variable 1-5
NCKAP1L	Nck-associated protein 1-like
CTSG	Cathepsin G
S100A1	Protein S100-A1
INAVA	Innate immunity activator protein
COLEC12	Collectin-12
BTN3A3	Butyrophilin subfamily 3 member A3
BTN3A1	Butyrophilin subfamily 3 member A1
C6orf120	UPF0669 protein C6orf120
SFPQ	Splicing factor, proline- and glutamine-rich
BPIFB2	BPI fold-containing family B member 2
MS4A1	B-lymphocyte antigen CD20
IST1	IST1 homolog
PSMA8	Proteasome subunit alpha type-7-like
IL1RN	Interleukin-1 receptor antagonist protein
ALCAM	CD166 antigen
ADCYAP1	Pituitary adenylate cyclase-activating polypeptide
NCKAP1	Nck-associated protein 1
IGKV1-17	Immunoglobulin kappa variable 1-17
IGKV1-39	Immunoglobulin kappa variable 1-39
IGKV1-33	Immunoglobulin kappa variable 1-33
IGKV1D-33	Immunoglobulin kappa variable 1D-33
JCHAIN	Immunoglobulin J chain
ULBP3	NKG2D ligand 3
IL2RA	Interleukin-2 receptor subunit alpha
IL1B	Interleukin-1 beta
IL1A	Interleukin-1 alpha
IGHV4-34	Immunoglobulin heavy variable 4-34
IFNG	Interferon gamma
IFNA14	Interferon alpha-14
IFNA7	Interferon alpha-7
IFNA10	Interferon alpha-10
IFNA1	Interferon alpha-1/13
HEXIM1	Protein HEXIM1
MUC4	Mucin-4
FOXP3	Forkhead box protein P3
TGFB2	Transforming growth factor beta-2
IFI35	Interferon-induced 35 kDa protein
ELANE	Neutrophil elastase
LILRB2	Leukocyte immunoglobulin-like receptor subfamily B member 2
AQP4	Aquaporin-4
F2RL1	Proteinase-activated receptor 2
HSP90AB1	Heat shock protein HSP 90-beta
GUSB	Beta-glucuronidase
PSMC4	26S proteasome regulatory subunit 6B
VCP	Transitional endoplasmic reticulum ATPase
NR1H2	Oxysterols receptor LXR-beta
GEM	GTP-binding protein GEM
NKX2-3	Homeobox protein Nkx-2.3
PSMD4	26S proteasome non-ATPase regulatory subunit 4
CCL21	C-C motif chemokine 21
MAVS	Mitochondrial antiviral-signaling protein
ACKR2	Atypical chemokine receptor 2
PUM2	Pumilio homolog 2
KIR2DS4	Killer cell immunoglobulin-like receptor 2DS4
KIR2DS2	Killer cell immunoglobulin-like receptor 2DS2
KIR3DL1	Killer cell immunoglobulin-like receptor 3DL1
KIR2DL3	Killer cell immunoglobulin-like receptor 2DL3
KIR2DL2	Killer cell immunoglobulin-like receptor 2DL2
KIR2DL1	Killer cell immunoglobulin-like receptor 2DL1
AIF1	Allograft inflammatory factor 1
TMC6	Transmembrane channel-like protein 6
PLEKHA1	Pleckstrin homology domain-containing family A member 1
IGF2R	Cation-independent mannose-6-phosphate receptor
TKFC	Triokinase/FMN cyclase
PECAM1	Platelet endothelial cell adhesion molecule
C16orf62	UPF0505 protein C16orf62
SPTAN1	Spectrin alpha chain, non-erythrocytic 1
S4R3C0	Uncharacterized protein
LBP	Lipopolysaccharide-binding protein
CCR4	C-C chemokine receptor type 4
CCR9	C-C chemokine receptor type 9
DERA	Deoxyribose-phosphate aldolase
PSMB11	Proteasome subunit beta type-11
IGLV4-3	Immunoglobulin lambda variable 4-3
IGLV3-9	Immunoglobulin lambda variable 3-9
IGLV3-10	Immunoglobulin lambda variable 3-10
IGLV3-12	Immunoglobulin lambda variable 3-12
IGLV3-16	Immunoglobulin lambda variable 3-16
IGLV2-18	Immunoglobulin lambda variable 2-18
IGLV3-22	Immunoglobulin lambda variable 3-22
IGLV2-33	Immunoglobulin lambda variable 2-33 (non-functional)
IGLV5-37	Immunoglobulin lambda variable 5-37
P2RX7	P2X purinoceptor 7
ATP8B4	Probable phospholipid-transporting ATPase IM
MSH2	DNA mismatch repair protein Msh2
MATR3	Matrin-3
IGLV7-46	Immunoglobulin lambda variable 7-46
IGLV5-48	Immunoglobulin lambda variable 5-48 (non-functional)
IGLV1-50	Immunoglobulin lambda variable 1-50 (non-functional)
IGLV10-54	Immunoglobulin lambda variable 10-54
IGLV11-55	Immunoglobulin lambda variable 11-55 (non-functional)
IGLV4-60	Immunoglobulin lambda variable 4-60
IGLV8-61	Immunoglobulin lambda variable 8-61
OLFM4	Olfactomedin-4
WIPF2	WAS/WASL-interacting protein family member 2
CTSK	Cathepsin K
IGLV4-69	Immunoglobulin lambda variable 4-69
IGKV1D-42	Immunoglobulin kappa variable 1D-42 (non-functional)
IGKV3-7	Immunoglobulin kappa variable 3-7 (non-functional)
TRAF6	TNF receptor-associated factor 6
OSTF1	Osteoclast-stimulating factor 1
C2	Complement C2
PTPN1	Tyrosine-protein phosphatase non-receptor type 1
PSMA5	Proteasome subunit alpha type-5
PSMB4	Proteasome subunit beta type-4
STXBP2	Syntaxin-binding protein 2
TNFAIP3	Tumor necrosis factor alpha-induced protein 3
CNR1	Cannabinoid receptor 1
MASP1	Mannan-binding lectin serine protease 1
PLCG2	1-phosphatidylinositol 4,5-bisphosphate phosphodiesterase gamma-2
PIK3CG	Phosphatidylinositol 4,5-bisphosphate 3-kinase catalytic subunit gamma isoform
DOK3	Docking protein 3
IL7R	Interleukin-7 receptor subunit alpha
CYFIP1	Cytoplasmic FMR1-interacting protein 1
IFNL3	Interferon lambda-3
CST3	Cystatin-C
C5	Complement C5
C3	Complement C3
MCOLN2	Mucolipin-2
SERPINA3	Alpha-1-antichymotrypsin
SERPINA1	Alpha-1-antitrypsin
SERPINC1	Antithrombin-III
EXOSC6	Exosome complex component MTR3
PTPRN2	Receptor-type tyrosine-protein phosphatase N2
PRKCZ	Protein kinase C zeta type
IFNGR2	Interferon gamma receptor 2
TNFRSF14	Tumor necrosis factor receptor superfamily member 14
LAMP1	Lysosome-associated membrane glycoprotein 1
TRIL	TLR4 interactor with leucine rich repeats
BCR	Breakpoint cluster region protein
CST7	Cystatin-F
RNF8	E3 ubiquitin-protein ligase RNF8
CLEC4D	C-type lectin domain family 4 member D
MBL2	Mannose-binding protein C
PYGB	Glycogen phosphorylase, brain form
ITGAM	Integrin alpha-M
CD226	CD226 antigen
NPY5R	Neuropeptide Y receptor type 5
ACLY	ATP-citrate synthase
NCR1	Natural cytotoxicity triggering receptor 1
RSAD2	Radical S-adenosyl methionine domain-containing protein 2
TAB1	TGF-beta-activated kinase 1 and MAP3K7-binding protein 1
PSPC1	Paraspeckle component 1
MGST1	Microsomal glutathione S-transferase 1
ELF2	ETS-related transcription factor Elf-2
RC3H1	Roquin-1
CTSH	Pro-cathepsin H
CD8B	T-cell surface glycoprotein CD8 beta chain
NCF2	Neutrophil cytosol factor 2
FAS	Tumor necrosis factor receptor superfamily member 6
FCGR2C	Low affinity immunoglobulin gamma Fc region receptor II-c
SHMT2	Serine hydroxymethyltransferase, mitochondrial
MMP12	Macrophage metalloelastase
FPR1	fMet-Leu-Phe receptor
IL15	Interleukin-15
XCL1	Lymphotactin
NLRP6	NACHT, LRR and PYD domains-containing protein 6
IL1F10	Interleukin-1 family member 10
ATP11A	Probable phospholipid-transporting ATPase IH
SEMA3C	Semaphorin-3C
FCAMR	High affinity immunoglobulin alpha and immunoglobulin mu Fc receptor
CPLX2	Complexin-2
RARRES2	Retinoic acid receptor responder protein 2
CITED1	Cbp/p300-interacting transactivator 1
CD300LB	CMRF35-like molecule 7
IRAK3	Interleukin-1 receptor-associated kinase 3
DAPK1	Death-associated protein kinase 1
A2M	Alpha-2-macroglobulin
BRK1	Protein BRICK1
SLC2A3	Solute carrier family 2, facilitated glucose transporter member 3
IL2RG	Cytokine receptor common subunit gamma
HSPA8	Heat shock cognate 71 kDa protein
STYK1	Tyrosine-protein kinase STYK1
MED1	Mediator of RNA polymerase II transcription subunit 1
OASL	2'-5'-oligoadenylate synthase-like protein
LIMK1	LIM domain kinase 1
VCL	Vinculin
S100A14	Protein S100-A14
CTSC	Dipeptidyl peptidase 1
CD97	CD97 antigen
COPB1	Coatomer subunit beta
ZP3	Zona pellucida sperm-binding protein 3
MAPK1	Mitogen-activated protein kinase 1
C5AR1	C5a anaphylatoxin chemotactic receptor 1
KLRC1	NKG2-A/NKG2-B type II integral membrane protein
CCL13	C-C motif chemokine 13
LILRA2	Leukocyte immunoglobulin-like receptor subfamily A member 2
BCL6B	B-cell CLL/lymphoma 6 member B protein
ORMDL3	ORM1-like protein 3
THEMIS2	Protein THEMIS2
CNN2	Calponin-2
CEACAM8	Carcinoembryonic antigen-related cell adhesion molecule 8
FCGR2B	Low affinity immunoglobulin gamma Fc region receptor II-b
DEFB106A	Beta-defensin 106
HBB	Hemoglobin subunit beta
CD180	CD180 antigen
ALDH3B1	Aldehyde dehydrogenase family 3 member B1
PARP9	Poly [ADP-ribose] polymerase 9
S100A11	Protein S100-A11
APOBEC3A	DNA dC->dU-editing enzyme APOBEC-3A
PARK7	Protein/nucleic acid deglycase DJ-1
IGHV3OR16-8	Immunoglobulin heavy variable 3/OR16-8 (non-functional)
IGHV3OR16-10	Immunoglobulin heavy variable 3/OR16-10 (non-functional)
IGHV3OR16-13	Immunoglobulin heavy variable 3/OR16-13 (non-functional)
CREBBP	CREB-binding protein
MAP3K5	Mitogen-activated protein kinase kinase kinase 5
IGHV3OR15-7	Immunoglobulin heavy variable 3/OR15-7 (pseudogene)
IGKV1OR2-108	Immunoglobulin kappa variable 1/OR2-108 (non-functional)
IGHV1OR15-1	Immunoglobulin heavy variable 1/OR15-1 (non-functional)
IGHV3OR16-12	Immunoglobulin heavy variable 3/OR16-12 (non-functional)
EGR1	Early growth response protein 1
TRAV19	T-cell receptor alpha variable 19
GPI	Glucose-6-phosphate isomerase
FCER2	Low affinity immunoglobulin epsilon Fc receptor
APOA4	Apolipoprotein A-IV
CEBPG	CCAAT/enhancer-binding protein gamma
IGKV4-1	Immunoglobulin kappa variable 4-1
CIITA	MHC class II transactivator
HLA-DOA	HLA class II histocompatibility antigen, DO alpha chain
TRAV18	T-cell receptor alpha variable 18
ANO6	Anoctamin-6
TRAV14DV4	T-cell receptor alpha variable 14/delta variable 4
TRAV9-1	T-cell receptor alpha variable 9-1
IGKV1D-37	Immunoglobulin kappa variable 1-37 (non-functional)
IGKV2D-30	Immunoglobulin kappa variable 2D-30
IGKV1-27	Immunoglobulin kappa variable 1-27
IGKV1D-17	Immunoglobulin kappa variable 1D-17
IGKV2D-29	Immunoglobulin kappa variable 2D-29
IGKV2D-24	Immunoglobulin kappa variable 2D-24 (non-functional)
IGHV4-4	Immunoglobulin heavy variable 4-4
IL34	Interleukin-34
TNFRSF6B	Tumor necrosis factor receptor superfamily member 6B
TNFSF8	Tumor necrosis factor ligand superfamily member 8
CD70	CD70 antigen
SLC15A4	Solute carrier family 15 member 4
NPDC1	Neural proliferation differentiation and control protein 1
ICAM3	Intercellular adhesion molecule 3
SIGLEC15	Sialic acid-binding Ig-like lectin 15
DDOST	Dolichyl-diphosphooligosaccharide--protein glycosyltransferase 48 kDa subunit
RUNX1	Runt-related transcription factor 1
PLCG1	1-phosphatidylinositol 4,5-bisphosphate phosphodiesterase gamma-1
ANXA3	Annexin A3
NIT2	Omega-amidase NIT2
CD3E	T-cell surface glycoprotein CD3 epsilon chain
GNS	N-acetylglucosamine-6-sulfatase
CD83	CD83 antigen
IGHD1-1	Immunoglobulin heavy diversity 1-1
IGLC3	Immunoglobulin lambda constant 3
IGLC2	Immunoglobulin lambda constant 2
C8orf4	Protein C8orf4
PIK3R6	Phosphoinositide 3-kinase regulatory subunit 6
PPIE	Peptidyl-prolyl cis-trans isomerase E
PGLYRP4	Peptidoglycan recognition protein 4
PRKACB	cAMP-dependent protein kinase catalytic subunit beta
HLA-C	HLA class I histocompatibility antigen, Cw-17 alpha chain
CBL	E3 ubiquitin-protein ligase CBL
PSMD13	26S proteasome non-ATPase regulatory subunit 13
KLK7	Kallikrein-7
GALNS	N-acetylgalactosamine-6-sulfatase
TRIM4	E3 ubiquitin-protein ligase TRIM4
ICAM1	Intercellular adhesion molecule 1
PSMC3	26S proteasome regulatory subunit 6A
IGKV1-13	Immunoglobulin kappa variable 1-13
IGHV4-38-2	Immunoglobulin heavy variable 4-38-2
IGHV4-30-4	Immunoglobulin heavy variable 4-30-4
IGHV3-43D	Immunoglobulin heavy variable 3-43D
IGHV3-30-5	Immunoglobulin heavy variable 3-30-5
IGHV3-30-3	Immunoglobulin heavy variable 3-30-3
IGHV1-8	Immunoglobulin heavy variable 1-8
SHC1	SHC-transforming protein 1
PTPN6	Tyrosine-protein phosphatase non-receptor type 6
TNFSF18	Tumor necrosis factor ligand superfamily member 18
LILRB3	Leukocyte immunoglobulin-like receptor subfamily B member 3
PRKACG	cAMP-dependent protein kinase catalytic subunit gamma
CYLD	Ubiquitin carboxyl-terminal hydrolase CYLD
GMFG	Glia maturation factor gamma
LGALS3	Galectin-3
CR1	Complement receptor type 1
PLPP4	Phospholipid phosphatase 4
GM2A	Ganglioside GM2 activator
LTB	Lymphotoxin-beta
IFNA8	Interferon alpha-8
RGCC	Regulator of cell cycle RGCC
PSME2	Proteasome activator complex subunit 2
TNIP3	TNFAIP3-interacting protein 3
PRTN3	Myeloblastin
TFEB	Transcription factor EB
XAF1	XIAP-associated factor 1
FAM3A	Protein FAM3A
XIAP	E3 ubiquitin-protein ligase XIAP
RNASE3	Eosinophil cationic protein
FABP5	Fatty acid-binding protein, epidermal
TNFRSF1A	Tumor necrosis factor receptor superfamily member 1A
MID2	Probable E3 ubiquitin-protein ligase MID2
GPR84	G-protein coupled receptor 84
AMPD3	AMP deaminase 3
EMP2	Epithelial membrane protein 2
METTL7A	Methyltransferase-like protein 7A
CAMK2A	Calcium/calmodulin-dependent protein kinase type II subunit alpha
RGS1	Regulator of G-protein signaling 1
MUL1	Mitochondrial ubiquitin ligase activator of NFKB 1
HAMP	Hepcidin
COL3A1	Collagen alpha-1(III) chain
TLR9	Toll-like receptor 9
COL2A1	Collagen alpha-1(II) chain
COL1A1	Collagen alpha-1(I) chain
LRRC7	Leucine-rich repeat-containing protein 7
PADI2	Protein-arginine deiminase type-2
BAIAP2	Brain-specific angiogenesis inhibitor 1-associated protein 2
DCST1	DC-STAMP domain-containing protein 1
SYNCRIP	Heterogeneous nuclear ribonucleoprotein Q
PTGES2	Prostaglandin E synthase 2
CDC42	Cell division control protein 42 homolog
ACAA1	3-ketoacyl-CoA thiolase, peroxisomal
SELENOS	Selenoprotein S
2017-03-08	E3 ubiquitin-protein ligase MARCH8
HMHB1	Minor histocompatibility protein HB-1
FCAR	Immunoglobulin alpha Fc receptor
CD53	Leukocyte surface antigen CD53
MUC5AC	Mucin-5AC
THBS1	Thrombospondin-1
ERCC1	DNA excision repair protein ERCC-1
EXO1	Exonuclease 1
TNFAIP6	Tumor necrosis factor-inducible gene 6 protein
MS4A2	High affinity immunoglobulin epsilon receptor subunit beta
IL32	Interleukin-32
IGLL5	Immunoglobulin lambda-like polypeptide 5
LYN	Tyrosine-protein kinase Lyn
YES1	Tyrosine-protein kinase Yes
IL5RA	Interleukin-5 receptor subunit alpha
VCAM1	Vascular cell adhesion protein 1
PLCL2	Inactive phospholipase C-like protein 2
TRIM35	Tripartite motif-containing protein 35
CRISPLD2	Cysteine-rich secretory protein LCCL domain-containing 2
RAET1E	NKG2D ligand 4
IFNE	Interferon epsilon
LOXL3	Lysyl oxidase homolog 3
TOLLIP	Toll-interacting protein
NCF4	Neutrophil cytosol factor 4
WDFY1	WD repeat and FYVE domain-containing protein 1
NLRC5	Protein NLRC5
PKHD1L1	Fibrocystin-L
JUP	Junction plakoglobin
ETS1	Protein C-ets-1
SLC44A2	Choline transporter-like protein 2
B2M	Beta-2-microglobulin
STXBP1	Syntaxin-binding protein 1
LRRC14	Leucine-rich repeat-containing protein 14
KARS	Lysine--tRNA ligase
IDO1	Indoleamine 2,3-dioxygenase 1
TNFSF9	Tumor necrosis factor ligand superfamily member 9
TNIP1	TNFAIP3-interacting protein 1
PSMD6	26S proteasome non-ATPase regulatory subunit 6
MASP2	Mannan-binding lectin serine protease 2
STXBP3	Syntaxin-binding protein 3
LGALS9	Galectin-9
CSK	Tyrosine-protein kinase CSK
UBB	Polyubiquitin-B
MUC5B	Mucin-5B
CCL24	C-C motif chemokine 24
SNAP23	Synaptosomal-associated protein 23
WNT5A	Protein Wnt-5a
MYO1C	Unconventional myosin-Ic
SPNS2	Protein spinster homolog 2
CD200	OX-2 membrane glycoprotein
PYDC2	Pyrin domain-containing protein 2
IGLC1	Immunoglobulin lambda constant 1
PTK6	Protein-tyrosine kinase 6
NOD2	Nucleotide-binding oligomerization domain-containing protein 2
PGAM1	Phosphoglycerate mutase 1
ALOX15	Arachidonate 15-lipoxygenase
APOBEC3G	DNA dC->dU-editing enzyme APOBEC-3G
TIMP2	Metalloproteinase inhibitor 2
ELMO1	Engulfment and cell motility protein 1
APLF	Aprataxin and PNK-like factor
NCSTN	Nicastrin
GBF1	Golgi-specific brefeldin A-resistance guanine nucleotide exchange factor 1
PKP1	Plakophilin-1
SBSPON	Somatomedin-B and thrombospondin type-1 domain-containing protein
TNFAIP1	BTB/POZ domain-containing adapter for CUL3-mediated RhoA degradation protein 2
ENPP2	Ectonucleotide pyrophosphatase/phosphodiesterase family member 2
DUSP3	Dual specificity protein phosphatase 3
RORC	Nuclear receptor ROR-gamma
DEFB108A	Putative beta-defensin 108A
TRAFD1	TRAF-type zinc finger domain-containing protein 1
PLAUR	Urokinase plasminogen activator surface receptor
IGHV1-69-2	Immunoglobulin heavy variable 1-69-2
IFNLR1	Interferon lambda receptor 1
IFNL1	Interferon lambda-1
SH2D6	SH2 domain-containing protein 6
HLA-DPB1	HLA class II histocompatibility antigen, DP beta 1 chain
TCF12	Transcription factor 12
TCRA	T-cell receptor alpha chain V region CTL-L17
P04436	T-cell receptor alpha chain V region HPB-MLT
TCRB	T-cell receptor beta chain V region CTL-L17
IGKV3-11	Immunoglobulin kappa variable 3-11
IGKV1D-39	Immunoglobulin kappa variable 1D-39
IGKV1-16	Immunoglobulin kappa variable 1-16
RAB31	Ras-related protein Rab-31
SARM1	Sterile alpha and TIR motif-containing protein 1
IFIH1	Interferon-induced helicase C domain-containing protein 1
GAPDH	Glyceraldehyde-3-phosphate dehydrogenase
CUL1	Cullin-1
DEFB126	Beta-defensin 126
SETD2	Histone-lysine N-methyltransferase SETD2
HLA-DQA2	HLA class II histocompatibility antigen, DQ alpha 2 chain
CX3CL1	Fractalkine
HLA-DRB1	HLA class II histocompatibility antigen, DRB1-15 beta chain
BTN3A2	Butyrophilin subfamily 3 member A2
HLA-DQB1	HLA class II histocompatibility antigen, DQ beta 1 chain
NOTCH1	Neurogenic locus notch homolog protein 1
ATAD3B	ATPase family AAA domain-containing protein 3B
RBCK1	RanBP-type and C3HC4-type zinc finger-containing protein 1
PTX3	Pentraxin-related protein PTX3
ALDOC	Fructose-bisphosphate aldolase C
ITGB7	Integrin beta-7
LTA4H	Leukotriene A-4 hydrolase
PKM	Pyruvate kinase PKM
TRIM34	Tripartite motif-containing protein 34
CXCL11	C-X-C motif chemokine 11
IGKV3OR2-268	Immunoglobulin kappa variable 3/OR2-268 (non-functional)
CSF3	Granulocyte colony-stimulating factor
ALOX5	Arachidonate 5-lipoxygenase
IFIT1	Interferon-induced protein with tetratricopeptide repeats 1
IFIT2	Interferon-induced protein with tetratricopeptide repeats 2
IFI6	Interferon alpha-inducible protein 6
IGKV1-12	Immunoglobulin kappa variable 1-12
IGKV1-6	Immunoglobulin kappa variable 1-6
IGKV1-9	Immunoglobulin kappa variable 1-9
IGKV2-24	Immunoglobulin kappa variable 2-24
IGKV1-8	Immunoglobulin kappa variable 1-8
IGHJ1	Immunoglobulin heavy joining 1
IGKV3D-7	Immunoglobulin kappa variable 3D-7
IGHV2-70D	Immunoglobulin heavy variable 2-70D
IGHV3-66	Immunoglobulin heavy variable 3-66
IGHV4-61	Immunoglobulin heavy variable 4-61
EEF1A1	Elongation factor 1-alpha 1
IGHV1-58	Immunoglobulin heavy variable 1-58
IGHV5-51	Immunoglobulin heavy variable 5-51
IGHV3-38	Immunoglobulin heavy variable 3-38 (non-functional)
IGHV3-35	Immunoglobulin heavy variable 3-35 (non-functional)
IGHV4-28	Immunoglobulin heavy variable 4-28
IGHV1-24	Immunoglobulin heavy variable 1-24
IGHV3-20	Immunoglobulin heavy variable 3-20
IGHV1-18	Immunoglobulin heavy variable 1-18
IGHV3-16	Immunoglobulin heavy variable 3-16 (non-functional)
IGHV1-3	Immunoglobulin heavy variable 1-3
IGKV6D-41	Immunoglobulin kappa variable 6D-41 (non-functional)
IGKV3D-20	Immunoglobulin kappa variable 3D-20
IGKV6-21	Immunoglobulin kappa variable 6-21
MUC19	Mucin-19
GRAP	GRB2-related adapter protein
CHI3L1	Chitinase-3-like protein 1
IQGAP2	Ras GTPase-activating-like protein IQGAP2
CAMK2D	Calcium/calmodulin-dependent protein kinase type II subunit delta
OLR1	Oxidized low-density lipoprotein receptor 1
RIPK1	Receptor-interacting serine/threonine-protein kinase 1
CCT2	T-complex protein 1 subunit beta
ITK	Tyrosine-protein kinase ITK/TSK
APOBEC3H	DNA dC->dU-editing enzyme APOBEC-3H
SRPK2	SRSF protein kinase 2
COLEC11	Collectin-11
PLAC8	Placenta-specific gene 8 protein
DEFB132	Beta-defensin 132
PSME3	Proteasome activator complex subunit 3
TREM2	Triggering receptor expressed on myeloid cells 2
FGR	Tyrosine-protein kinase Fgr
TGFBR3	Transforming growth factor beta receptor type 3
PIK3AP1	Phosphoinositide 3-kinase adapter protein 1
CAV1	Caveolin-1
RAP2B	Ras-related protein Rap-2b
RAP1B	Ras-related protein Rap-1b
ABCE1	ATP-binding cassette sub-family E member 1
CCL16	C-C motif chemokine 16
TLR3	Toll-like receptor 3
HRG	Histidine-rich glycoprotein
CCL25	C-C motif chemokine 25
PLD1	Phospholipase D1
TRAT1	T-cell receptor-associated transmembrane adapter 1
PRNP	Major prion protein
STX7	Syntaxin-7
PI3	Elafin
ACTR10	Actin-related protein 10
PLA2G3	Group 3 secretory phospholipase A2
ITGAD	Integrin alpha-D
PTPRS	Receptor-type tyrosine-protein phosphatase S
ERAP1	Endoplasmic reticulum aminopeptidase 1
APOB	Apolipoprotein B-100
IFIT5	Interferon-induced protein with tetratricopeptide repeats 5
IL13	Interleukin-13
KCNAB2	Voltage-gated potassium channel subunit beta-2
TLR7	Toll-like receptor 7
TRIM27	Zinc finger protein RFP
CD3G	T-cell surface glycoprotein CD3 gamma chain
CD68	Macrosialin
ACTR2	Actin-related protein 2
ACTR3	Actin-related protein 3
SIN3A	Paired amphipathic helix protein Sin3a
DCD	Dermcidin
FPR3	N-formyl peptide receptor 3
NCR3LG1	Natural cytotoxicity triggering receptor 3 ligand 1
CSF1	Macrophage colony-stimulating factor 1
HMOX1	Heme oxygenase 1
SIGLEC5	Sialic acid-binding Ig-like lectin 5
STOM	Erythrocyte band 7 integral membrane protein
RAB14	Ras-related protein Rab-14
PTEN	Phosphatidylinositol 3,4,5-trisphosphate 3-phosphatase and dual-specificity protein phosphatase PTEN
NR1H4	Bile acid receptor
PAK2	Serine/threonine-protein kinase PAK 2
PRDX4	Peroxiredoxin-4
FADD	FAS-associated death domain protein
PAK1	Serine/threonine-protein kinase PAK 1
TINAGL1	Tubulointerstitial nephritis antigen-like
PTGER4	Prostaglandin E2 receptor EP4 subtype
CALCOCO2	Calcium-binding and coiled-coil domain-containing protein 2
NR1H3	Oxysterols receptor LXR-alpha
NLRP2	NACHT, LRR and PYD domains-containing protein 2
CCR10	C-C chemokine receptor type 10
TRAF3	TNF receptor-associated factor 3
MUC21	Mucin-21
MT2A	Metallothionein-2
FTH1	Ferritin heavy chain
FTL	Ferritin light chain
HPX	Hemopexin
MIF	Macrophage migration inhibitory factor
TFRC	Transferrin receptor protein 1
SH2D1A	SH2 domain-containing protein 1A
RAET1G	Retinoic acid early transcript 1G protein
CXCL10	C-X-C motif chemokine 10
PPBP	Platelet basic protein
CD40LG	CD40 ligand
SELL	L-selectin
ORM1	Alpha-1-acid glycoprotein 1
AMBP	Protein AMBP
TRIM13	E3 ubiquitin-protein ligase TRIM13
LRG1	Leucine-rich alpha-2-glycoprotein
C9	Complement component C9
C1QB	Complement C1q subcomponent subunit B
C1QA	Complement C1q subcomponent subunit A
CACNA1F	Voltage-dependent L-type calcium channel subunit alpha-1F
APCS	Serum amyloid P-component
GPR33	Probable G-protein coupled receptor 33
PQBP1	Polyglutamine-binding protein 1
ADAMTS13	A disintegrin and metalloproteinase with thrombospondin motifs 13
HIST1H2BK	Histone H2B type 1-K
SEMG2	Semenogelin-2
IL4R	Interleukin-4 receptor subunit alpha
KDELR1	ER lumen protein-retaining receptor 1
PLSCR1	Phospholipid scramblase 1
DEFB134	Beta-defensin 134
ARPC3	Actin-related protein 2/3 complex subunit 3
ARPC2	Actin-related protein 2/3 complex subunit 2
ARPC1B	Actin-related protein 2/3 complex subunit 1B
CTSW	Cathepsin W
LCP2	Lymphocyte cytosolic protein 2
NPFF	Pro-FMRFamide-related neuropeptide FF
XRCC6	X-ray repair cross-complementing protein 6
POLR3E	DNA-directed RNA polymerase III subunit RPC5
DEGS1	Sphingolipid delta(4)-desaturase DES1
AGPAT2	1-acyl-sn-glycerol-3-phosphate acyltransferase beta
FYB1	FYN-binding protein 1
CHUK	Inhibitor of nuclear factor kappa-B kinase subunit alpha
SRC	Proto-oncogene tyrosine-protein kinase Src
PRAM1	PML-RARA-regulated adapter molecule 1
SMAD7	Mothers against decapentaplegic homolog 7
ORM2	Alpha-1-acid glycoprotein 2
TRIM32	E3 ubiquitin-protein ligase TRIM32
ATAD5	ATPase family AAA domain-containing protein 5
POLR3B	DNA-directed RNA polymerase III subunit RPC2
IL1RL1	Interleukin-1 receptor-like 1
IFITM2	Interferon-induced transmembrane protein 2
IFITM3	Interferon-induced transmembrane protein 3
CRACR2A	EF-hand calcium-binding domain-containing protein 4B
IL10RB	Interleukin-10 receptor subunit beta
TOM1	Target of Myb protein 1
MBP	Myelin basic protein
FGG	Fibrinogen gamma chain
FGB	Fibrinogen beta chain
FGA	Fibrinogen alpha chain
RIF1	Telomere-associated protein RIF1
CNPY3	Protein canopy homolog 3
APOA2	Apolipoprotein A-II
LGALS1	Galectin-1
SLCO4C1	Solute carrier organic anion transporter family member 4C1
APOA1	Apolipoprotein A-I
PLA2G6	85/88 kDa calcium-independent phospholipase A2
ACTB	Actin, cytoplasmic 1
LPXN	Leupaxin
CXCL1	Growth-regulated alpha protein
OTUD7B	OTU domain-containing protein 7B
GBP5	Guanylate-binding protein 5
CEP290	Centrosomal protein of 290 kDa
TMEM30A	Cell cycle control protein 50A
KDM6B	Lysine-specific demethylase 6B
RBM14	RNA-binding protein 14
FCRL4	Fc receptor-like protein 4
DEFA4	Neutrophil defensin 4
DEFB118	Beta-defensin 118
FAM49B	Protein FAM49B
TFE3	Transcription factor E3
TRIM56	E3 ubiquitin-protein ligase TRIM56
EIF2AK2	Interferon-induced, double-stranded RNA-activated protein kinase
PGLYRP2	N-acetylmuramoyl-L-alanine amidase
DEFA6	Defensin-6
DEFA5	Defensin-5
CAP1	Adenylyl cyclase-associated protein 1
RYDEN	Repressor of yield of DENV protein
TREML2	Trem-like transcript 2 protein
DHX9	ATP-dependent RNA helicase A
PPP3CA	Serine/threonine-protein phosphatase 2B catalytic subunit alpha isoform
ARHGAP9	Rho GTPase-activating protein 9
TRIM6	Tripartite motif-containing protein 6
JAK2	Tyrosine-protein kinase JAK2
KRT6A	Keratin, type II cytoskeletal 6A
OAS2	2'-5'-oligoadenylate synthase 2
SERPINB12	Serpin B12
DIAPH1	Protein diaphanous homolog 1
IGLV1-40	Immunoglobulin lambda variable 1-40
GLYCAM1	Putative glycosylation-dependent cell adhesion molecule 1
IGLV3-27	Immunoglobulin lambda variable 3-27
NLRP10	NACHT, LRR and PYD domains-containing protein 10
IGLV6-57	Immunoglobulin lambda variable 6-57
CAND1	Cullin-associated NEDD8-dissociated protein 1
CD4	T-cell surface glycoprotein CD4
IGHV1-69	Immunoglobulin heavy variable 1-69
IL21	Interleukin-21
CD34	Hematopoietic progenitor cell antigen CD34
CFHR1	Complement factor H-related protein 1
KLRF2	Killer cell lectin-like receptor subfamily F member 2
IFITM1	Interferon-induced transmembrane protein 1
H0YCG3	Uncharacterized protein
TUBB4B	Tubulin beta-4B chain
SERINC5	Serine incorporator 5
LYZ	Lysozyme C
LEP	Leptin
SEC61A1	Protein transport protein Sec61 subunit alpha isoform 1
TAP2	Antigen peptide transporter 2
TAP1	Antigen peptide transporter 1
OPRK1	Kappa-type opioid receptor
OPRD1	Delta-type opioid receptor
APOBEC3F	DNA dC->dU-editing enzyme APOBEC-3F
PVRIG	Transmembrane protein PVRIG
PELI2	E3 ubiquitin-protein ligase pellino homolog 2
CFHR4	Complement factor H-related protein 4
SMPDL3B	Acid sphingomyelinase-like phosphodiesterase 3b
IL1RL2	Interleukin-1 receptor-like 2
MUC7	Mucin-7
CLEC2B	C-type lectin domain family 2 member B
ARMC8	Armadillo repeat-containing protein 8
TCF7	Transcription factor 7
NPLOC4	Nuclear protein localization protein 4 homolog
TBC1D10C	Carabin
TRIM31	E3 ubiquitin-protein ligase TRIM31
CLEC10A	C-type lectin domain family 10 member A
CCL20	C-C motif chemokine 20
PTPRB	Receptor-type tyrosine-protein phosphatase beta
NLRX1	NLR family member X1
ARG2	Arginase-2, mitochondrial
ADAM17	Disintegrin and metalloproteinase domain-containing protein 17
PRKDC	DNA-dependent protein kinase catalytic subunit
IGHV2-70	Immunoglobulin heavy variable 2-70
IGHV2-5	Immunoglobulin heavy variable 2-5
UNC93B1	Protein unc-93 homolog B1
PIGR	Polymeric immunoglobulin receptor
IGKC	Immunoglobulin kappa constant
TRIM8	Probable E3 ubiquitin-protein ligase TRIM8
MMP9	Matrix metalloproteinase-9
PTPRC	Receptor-type tyrosine-protein phosphatase C
TRBC1	T-cell receptor beta-1 chain C region
IGHG1	Immunoglobulin heavy constant gamma 1
CHIA	Acidic mammalian chitinase
IGHM	Immunoglobulin heavy constant mu
IGHA1	Immunoglobulin heavy constant alpha 1
RNF135	E3 ubiquitin-protein ligase RNF135
TICAM1	TIR domain-containing adapter molecule 1
RHOA	Transforming protein RhoA
HLA-A	HLA class I histocompatibility antigen, A-68 alpha chain
ULBP1	NKG2D ligand 1
ULBP2	NKG2D ligand 2
PRKD2	Serine/threonine-protein kinase D2
HMGB3	High mobility group protein B3
MID1	E3 ubiquitin-protein ligase Midline-1
NMI	N-myc-interactor
CXCL3	C-X-C motif chemokine 3
CXCL2	C-X-C motif chemokine 2
FUCA1	Tissue alpha-L-fucosidase
HMSD	Serpin-like protein HMSD
NLRC3	NLR family CARD domain-containing protein 3
TRIM28	Transcription intermediary factor 1-beta
RAF1	RAF proto-oncogene serine/threonine-protein kinase
CAT	Catalase
KLRD1	Natural killer cells antigen CD94
LILRA6	Leukocyte immunoglobulin-like receptor subfamily A member 6
SLA	Src-like-adapter
CHIT1	Chitotriosidase-1
DCLRE1C	Protein artemis
VTN	Vitronectin
DNAJC3	DnaJ homolog subfamily C member 3
DSC1	Desmocollin-1
AOC1	Amiloride-sensitive amine oxidase [copper-containing]
SRPK1	SRSF protein kinase 1
PSMD2	26S proteasome non-ATPase regulatory subunit 2
ALAD	Delta-aminolevulinic acid dehydratase
APLN	Apelin
STAP1	Signal-transducing adaptor protein 1
CRK	Adapter molecule crk
TREM1	Triggering receptor expressed on myeloid cells 1
UBE2N	Ubiquitin-conjugating enzyme E2 N
UBE2K	Ubiquitin-conjugating enzyme E2 K
UBE2D3	Ubiquitin-conjugating enzyme E2 D3
NBN	Nibrin
DEFB103A	Beta-defensin 103
PRF1	Perforin-1
CD7	T-cell antigen CD7
CD99	CD99 antigen
ERBIN	Erbin
LAT2	Linker for activation of T-cells family member 2
RAB5B	Ras-related protein Rab-5B
RAB4B	Ras-related protein Rab-4B
AICDA	Single-stranded DNA cytosine deaminase
MYO1G	Unconventional myosin-Ig
IRAK4	Interleukin-1 receptor-associated kinase 4
UBR4	E3 ubiquitin-protein ligase UBR4
SPON2	Spondin-2
DEFB4A	Beta-defensin 4A
SURF4	Surfeit locus protein 4
CMTM6	CKLF-like MARVEL transmembrane domain-containing protein 6
MUC16	Mucin-16
LTBR	Tumor necrosis factor receptor superfamily member 3
TREML4	Trem-like transcript 4 protein
ENDOU	Poly(U)-specific endoribonuclease
IRF7	Interferon regulatory factor 7
ARHGEF2	Rho guanine nucleotide exchange factor 2
GNL1	Guanine nucleotide-binding protein-like 1
IL20RB	Interleukin-20 receptor subunit beta
LYST	Lysosomal-trafficking regulator
PRG4	Proteoglycan 4
FOXJ1	Forkhead box protein J1
ABI1	Abl interactor 1
ACTG1	Actin, cytoplasmic 2
STK11	Serine/threonine-protein kinase STK11
CTLA4	Cytotoxic T-lymphocyte protein 4
DEFB107A	Beta-defensin 107
CLEC4C	C-type lectin domain family 4 member C
DUSP10	Dual specificity protein phosphatase 10
CD300LG	CMRF35-like molecule 9
SYK	Tyrosine-protein kinase SYK
DEFB104A	Beta-defensin 104
IFNL2	Interferon lambda-2
LY96	Lymphocyte antigen 96
SKP1	S-phase kinase-associated protein 1
BMX	Cytoplasmic tyrosine-protein kinase BMX
RPS6KA3	Ribosomal protein S6 kinase alpha-3
ELF4	ETS-related transcription factor Elf-4
CLEC4G	C-type lectin domain family 4 member G
VAMP7	Vesicle-associated membrane protein 7
COLEC10	Collectin-10
TLR1	Toll-like receptor 1
LTA	Lymphotoxin-alpha
TNF	Tumor necrosis factor
ANGPT1	Angiopoietin-1
WASHC1	WASH complex subunit 1
ARID5A	AT-rich interactive domain-containing protein 5A
OAS3	2'-5'-oligoadenylate synthase 3
PCBP2	Poly(rC)-binding protein 2
A0A0G2JRQ6	Uncharacterized protein
CCR2	C-C chemokine receptor type 2
IGLV5-39	Immunoglobulin lambda variable 5-39
IL31RA	Interleukin-31 receptor subunit alpha
IFNL4	Interferon lambda-4
IRF4	Interferon regulatory factor 4
TESPA1	Protein TESPA1
PSMD14	26S proteasome non-ATPase regulatory subunit 14
BTNL8	Butyrophilin-like protein 8
AP2A2	AP-2 complex subunit alpha-2
PGM1	Phosphoglucomutase-1
MANBA	Beta-mannosidase
SERPINB10	Serpin B10
SERPINB4	Serpin B4
AKIRIN2	Akirin-2
ITLN1	Intelectin-1
PDXK	Pyridoxal kinase
PSMD8	26S proteasome non-ATPase regulatory subunit 8
IFNAR2	Interferon alpha/beta receptor 2
PRDX1	Peroxiredoxin-1
CD47	Leukocyte surface antigen CD47
PSMB5	Proteasome subunit beta type-5
PSMB6	Proteasome subunit beta type-6
HLA-DMB	HLA class II histocompatibility antigen, DM beta chain
HLA-DMA	HLA class II histocompatibility antigen, DM alpha chain
PSMB9	Proteasome subunit beta type-9
PSMB8	Proteasome subunit beta type-8
CD36	Platelet glycoprotein 4
PTK2	Focal adhesion kinase 1
LAIR1	Leukocyte-associated immunoglobulin-like receptor 1
CCL3L1	C-C motif chemokine 3-like 1
SUPT6H	Transcription elongation factor SPT6
MYD88	Myeloid differentiation primary response protein MyD88
SOS1	Son of sevenless homolog 1
PDE4D	cAMP-specific 3',5'-cyclic phosphodiesterase 4D
BAX	Apoptosis regulator BAX
ICAM2	Intercellular adhesion molecule 2
NCAM1	Neural cell adhesion molecule 1
DRD2	D(2) dopamine receptor
IL6R	Interleukin-6 receptor subunit alpha
CCL5	C-C motif chemokine 5
CCL2	C-C motif chemokine 2
MMTAG2	Multiple myeloma tumor-associated protein 2
TNFRSF17	Tumor necrosis factor receptor superfamily member 17
IGLV7-43	Immunoglobulin lambda variable 7-43
FUCA2	Plasma alpha-L-fucosidase
CD59	CD59 glycoprotein
IGHV1OR15-9	Immunoglobulin heavy variable 1/OR15-9 (non-functional)
IGHV2OR16-5	Immunoglobulin heavy variable 2/OR16-5 (non-functional)
IGHV3OR16-9	Immunoglobulin heavy variable 3/OR16-9 (non-functional)
IGKV1D-43	Immunoglobulin kappa variable 1D-43
IGHV3-72	Immunoglobulin heavy variable 3-72
IGLV9-49	Immunoglobulin lambda variable 9-49
POLR3G	DNA-directed RNA polymerase III subunit RPC7
IGKV2-40	Immunoglobulin kappa variable 2-40
IGHV3-43	Immunoglobulin heavy variable 3-43
IGHV3-74	Immunoglobulin heavy variable 3-74
COTL1	Coactosin-like protein
TRAV40	T-cell receptor alpha variable 40
CD79B	B-cell antigen receptor complex-associated protein beta chain
IGHV7-81	Immunoglobulin heavy variable 7-81 (non-functional)
IL16	Pro-interleukin-16
CDK13	Cyclin-dependent kinase 13
ECSIT	Evolutionarily conserved signaling intermediate in Toll pathway, mitochondrial
IGHV6-1	Immunoglobulin heavy variable 6-1
TRAV38-1	T-cell receptor alpha variable 38-1
V9GYV3	Uncharacterized protein
A0A087WW49	Uncharacterized protein
SLC27A2	Very long-chain acyl-CoA synthetase
AGL	Glycogen debranching enzyme
RAB29	Ras-related protein Rab-7L1
TRAV2	T-cell receptor alpha variable 2
TGFB1	Transforming growth factor beta-1
IGHV3-64	Immunoglobulin heavy variable 3-64
CD27	CD27 antigen
PPP1R14B	Protein phosphatase 1 regulatory subunit 14B
IGKV2-28	Immunoglobulin kappa variable 2-28
KRAS	GTPase KRas
HRAS	GTPase HRas
NRAS	GTPase NRas
GPER1	G-protein coupled estrogen receptor 1
KLHL6	Kelch-like protein 6
FOS	Proto-oncogene c-Fos
PRKCD	Protein kinase C delta type
TNFSF12-TNFSF13	Protein TNFSF12-TNFSF13
VAT1	Synaptic vesicle membrane protein VAT-1 homolog
HVCN1	Voltage-gated hydrogen channel 1
MAPKAPK2	MAP kinase-activated protein kinase 2
CLDN1	Claudin-1
ATP6V1D	V-type proton ATPase subunit D
SEMA7A	Semaphorin-7A
BPI	Bactericidal permeability-increasing protein
MGAM	Maltase-glucoamylase, intestinal
STAT2	Signal transducer and activator of transcription 2
TRAPPC1	Trafficking protein particle complex subunit 1
ARRB2	Beta-arrestin-2
RPL39	60S ribosomal protein L39
ITGAX	Integrin alpha-X
ITGAL	Integrin alpha-L
TEC	Tyrosine-protein kinase Tec
RPL30	60S ribosomal protein L30
TNFRSF18	Tumor necrosis factor receptor superfamily member 18
PRKCQ	Protein kinase C theta type
GPR32P1	Putative G-protein coupled receptor GPR32P1
BPIFA2	BPI fold-containing family A member 2
UBE2D2	Ubiquitin-conjugating enzyme E2 D2
RAP1A	Ras-related protein Rap-1A
NOTCH2	Neurogenic locus notch homolog protein 2
COL4A3BP	Collagen type IV alpha-3-binding protein
DDX58	Probable ATP-dependent RNA helicase DDX58
SLAMF6	SLAM family member 6
GBP2	Guanylate-binding protein 2
OSCAR	Osteoclast-associated immunoglobulin-like receptor
HRNR	Hornerin
WASL	Neural Wiskott-Aldrich syndrome protein
HFE	Hereditary hemochromatosis protein
SEMA4D	Semaphorin-4D
S100A13	Protein S100-A13
ZNF683	Tissue-resident T-cell transcription regulator protein ZNF683
DYNLT1	Dynein light chain Tctex-type 1
TREML1	Trem-like transcript 1 protein
PIK3R4	Phosphoinositide 3-kinase regulatory subunit 4
DYNLL1	Dynein light chain 1, cytoplasmic
MAPK10	Mitogen-activated protein kinase 10
MAP3K14	Mitogen-activated protein kinase kinase kinase 14
GGH	Gamma-glutamyl hydrolase
TRIM22	E3 ubiquitin-protein ligase TRIM22
JAML	Junctional adhesion molecule-like
GPR65	Psychosine receptor
LGMN	Legumain
NEU1	Sialidase-1
PIANP	PILR alpha-associated neural protein
HMGB2	High mobility group protein B2
IL27RA	Interleukin-27 receptor subunit alpha
PA2G4	Proliferation-associated protein 2G4
NSD2	Histone-lysine N-methyltransferase NSD2
DPP7	Dipeptidyl peptidase 2
CLEC2A	C-type lectin domain family 2 member A
NONO	Non-POU domain-containing octamer-binding protein
NECTIN1	Nectin-1
QSOX1	Sulfhydryl oxidase 1
NRROS	Negative regulator of reactive oxygen species
NPC2	Epididymal secretory protein E1
TMEM63A	CSC1-like protein 1
PPP3CB	Serine/threonine-protein phosphatase 2B catalytic subunit beta isoform
REG3G	Regenerating islet-derived protein 3-gamma
HLA-DRB5	HLA class II histocompatibility antigen, DR beta 5 chain
GLB1	Beta-galactosidase
PIK3CD	Phosphatidylinositol 4,5-bisphosphate 3-kinase catalytic subunit delta isoform
ATG12	Ubiquitin-like protein ATG12
PPP3R1	Calcineurin subunit B type 1
TNFRSF11B	Tumor necrosis factor receptor superfamily member 11B
STK10	Serine/threonine-protein kinase 10
STAT5B	Signal transducer and activator of transcription 5B
DDX60	Probable ATP-dependent RNA helicase DDX60
CCR8	C-C chemokine receptor type 8
CCR6	C-C chemokine receptor type 6
CCR5	C-C chemokine receptor type 5
CYBB	Cytochrome b-245 heavy chain
ARPC1A	Actin-related protein 2/3 complex subunit 1A
LCN2	Neutrophil gelatinase-associated lipocalin
LAIR2	Leukocyte-associated immunoglobulin-like receptor 2
CCL11	Eotaxin
PSMD1	26S proteasome non-ATPase regulatory subunit 1
OTUD7A	OTU domain-containing protein 7A
UBE2D1	Ubiquitin-conjugating enzyme E2 D1
PSMD7	26S proteasome non-ATPase regulatory subunit 7
IMPDH2	Inosine-5'-monophosphate dehydrogenase 2
SEMA4A	Semaphorin-4A
MUC13	Mucin-13
ELMO2	Engulfment and cell motility protein 2
LILRA4	Leukocyte immunoglobulin-like receptor subfamily A member 4
DSN1	Kinetochore-associated protein DSN1 homolog
HIST2H2BE	Histone H2B type 2-E
QPCT	Glutaminyl-peptide cyclotransferase
AQP9	Aquaporin-9
ADA	Adenosine deaminase
TRBC2	T-cell receptor beta-2 chain C region
HSPA1A	Heat shock 70 kDa protein 1A
RIPK2	Receptor-interacting serine/threonine-protein kinase 2
PADI4	Protein-arginine deiminase type-4
KYNU	Kynureninase
STAR	Steroidogenic acute regulatory protein, mitochondrial
CASP4	Caspase-4
TNFSF13	Tumor necrosis factor ligand superfamily member 13
PAWR	PRKC apoptosis WT1 regulator protein
IDH1	Isocitrate dehydrogenase [NADP] cytoplasmic
CPB2	Carboxypeptidase B2
SLC39A10	Zinc transporter ZIP10
HLA-B	HLA class I histocompatibility antigen, B-73 alpha chain
FUT7	Alpha-(1,3)-fucosyltransferase 7
PTPN2	Tyrosine-protein phosphatase non-receptor type 2
CXCL14	C-X-C motif chemokine 14
RAET1L	Retinoic acid early transcript 1L protein
CXCL13	C-X-C motif chemokine 13
DEFB131A	Beta-defensin 131A
AIRE	Autoimmune regulator
TYROBP	TYRO protein tyrosine kinase-binding protein
TYRO3	Tyrosine-protein kinase receptor TYRO3
MEF2C	Myocyte-specific enhancer factor 2C
CD209	CD209 antigen
PIK3R1	Phosphatidylinositol 3-kinase regulatory subunit alpha
TENM1	Teneurin-1
BPIFB3	BPI fold-containing family B member 3
USP17L2	Ubiquitin carboxyl-terminal hydrolase 17
PLAU	Urokinase-type plasminogen activator
F12	Coagulation factor XII
PRSS2	Trypsin-2
IL1R2	Interleukin-1 receptor type 2
HP	Haptoglobin
C1R	Complement C1r subcomponent
F2	Prothrombin
COCH	Cochlin
IFI16	Gamma-interferon-inducible protein 16
CFP	Properdin
FRMPD3	FERM and PDZ domain-containing protein 3
CACNB3	Voltage-dependent L-type calcium channel subunit beta-3
TUBB	Tubulin beta chain
NFIL3	Nuclear factor interleukin-3-regulated protein
MAPKAPK3	MAP kinase-activated protein kinase 3
POU2AF1	POU domain class 2-associating factor 1
LAMP3	Lysosome-associated membrane glycoprotein 3
TBX21	T-box transcription factor TBX21
CDC37	Hsp90 co-chaperone Cdc37
PRCP	Lysosomal Pro-X carboxypeptidase
MAPK14	Mitogen-activated protein kinase 14
[truncated: 113 more rows]

## Sheet: Sheet2
AmiGO 2
Accession: GO:0006955 Name: immune response Ontology: biological_process Definition: Any immune system process that functions in the calibrated response of an organism to a potential internal or invasive threat.
